# Supplementary material for: Diverse Sensory Repertoire of Paralogous Chemoreceptors Tlp2, Tlp3, and Tlp4 in Campylobacter jejuni
Source: PubMed Central journal article supplement (PMC9769880; doi:10.1128/spectrum.03646-22), 2022-11-14
Supplement: spectrum.03646-22-s0001.pdf [file spectrum.03646-22-s0001.pdf]

# Diverse sensory repertoire of paralogous chemoreceptors Tlp2, Tlp3 and Tlp4 in

## *Campylobacter jejuni*

Taha<sup>1</sup>ϵ, Bassam A. Elgamoudi<sup>1</sup>ϵ, Ekaterina P. Andrianova<sup>2</sup>, Thomas Haselhorst<sup>1</sup>, Christopher J. Day<sup>1</sup>, Lauren Hartley-Tassell<sup>1</sup>, Rebecca M. King<sup>1</sup>, Tahria Najnin<sup>1</sup>, Igor B. Zhulin<sup>2</sup> & Victoria Korolik<sup>1,3\*</sup>

<sup>1</sup>Institute for Glycomics, Griffith University, Gold Coast campus, QLD 4222, Australia.

<sup>2</sup>Department of Microbiology and Translational Data Analytics Institute, The Ohio State University, OH 43210, USA

<sup>3</sup>School of Pharmacy and Medical Science, Griffith University, Gold Coast campus, QLD 4222, Australia.

Griffith University, Gold Coast campus, QLD 4222, Australia.

ϵThese authors have contributed equally to this work.

\*Corresponding author. Email: v.korolik@griffith.edu.au

## SUPPORTING INFORMATION

**Figure S1.** Protein sequence alignment showing 30% identity and signalling domain completely identical across Tlp2, Tlp3 and Tlp4.





**Figure S3.** Relationship between dCache\_1 domains from *Campylobacterota* chemoreceptors. *C. jejuni* 11168-O chemoreceptors are shown in bold. Clades containing Tlp2, Tlp3 and Tlp4 colored in blue, purple and green, respectively. Tlp1-like clade is shown in orange. Conserved amino acid recognition motif is highlighted in grey. Amino acid numeration is based on the Tlp3 protein sequence. Bootstrap support values greater than 50% are shown. This figure is also available as a scalable pdf.

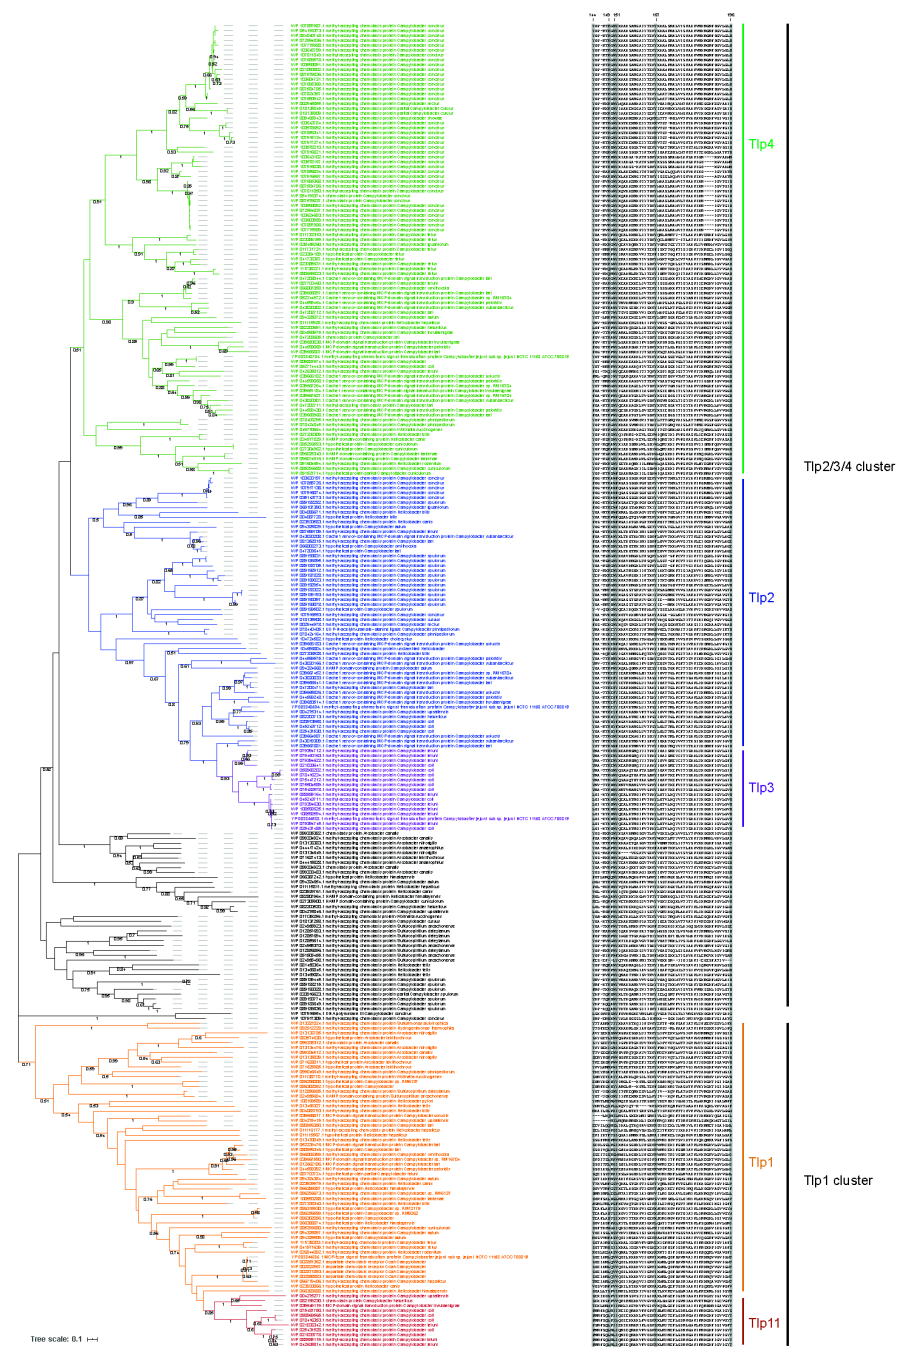

**Figure S4.** Phylogenetic tree of MCP signal domains from dCache\_1 containing chemoreceptors. *C. jejuni* 11168-O chemoreceptors are shown in bold. Sequences are coloured according to clustering of the respective sensing domain on dCache\_1 domain phylogenetic tree (Figure S3). Bootstrap percentage values greater than 40 are shown. This figure is also available as a scalable pdf.

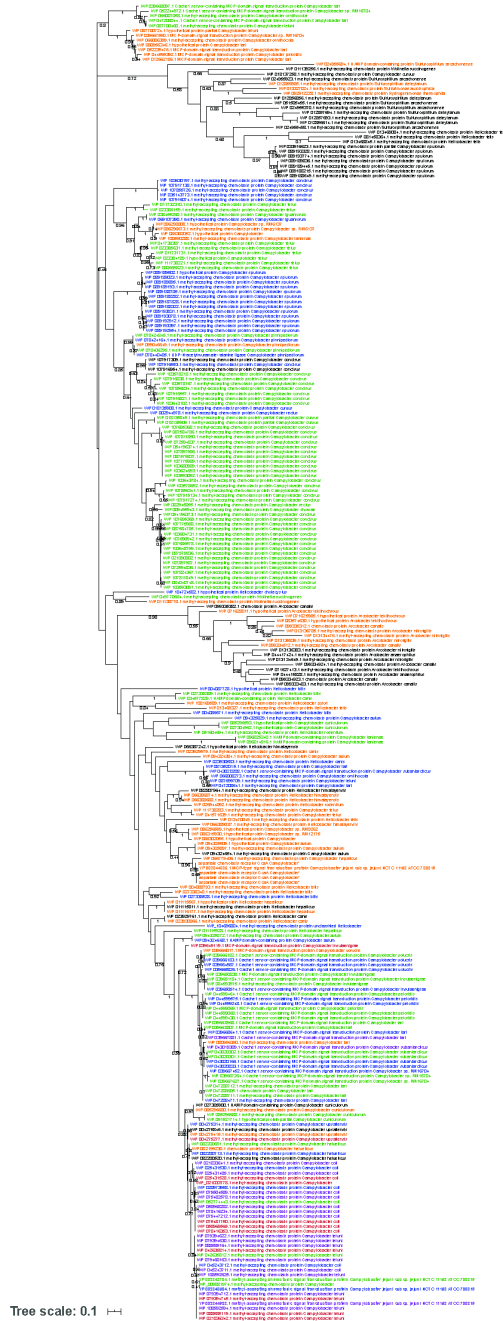

**Figure S5.** Surface Plasmon Resonance (SPR) sensograms for Tlp3<sup>peri</sup>, Tlp2<sup>peri</sup> and Tlp4<sup>peri</sup>. Single cycle SPR plots are shown as concentration dependent interactions between proteins and monosaccharides as illustrated.

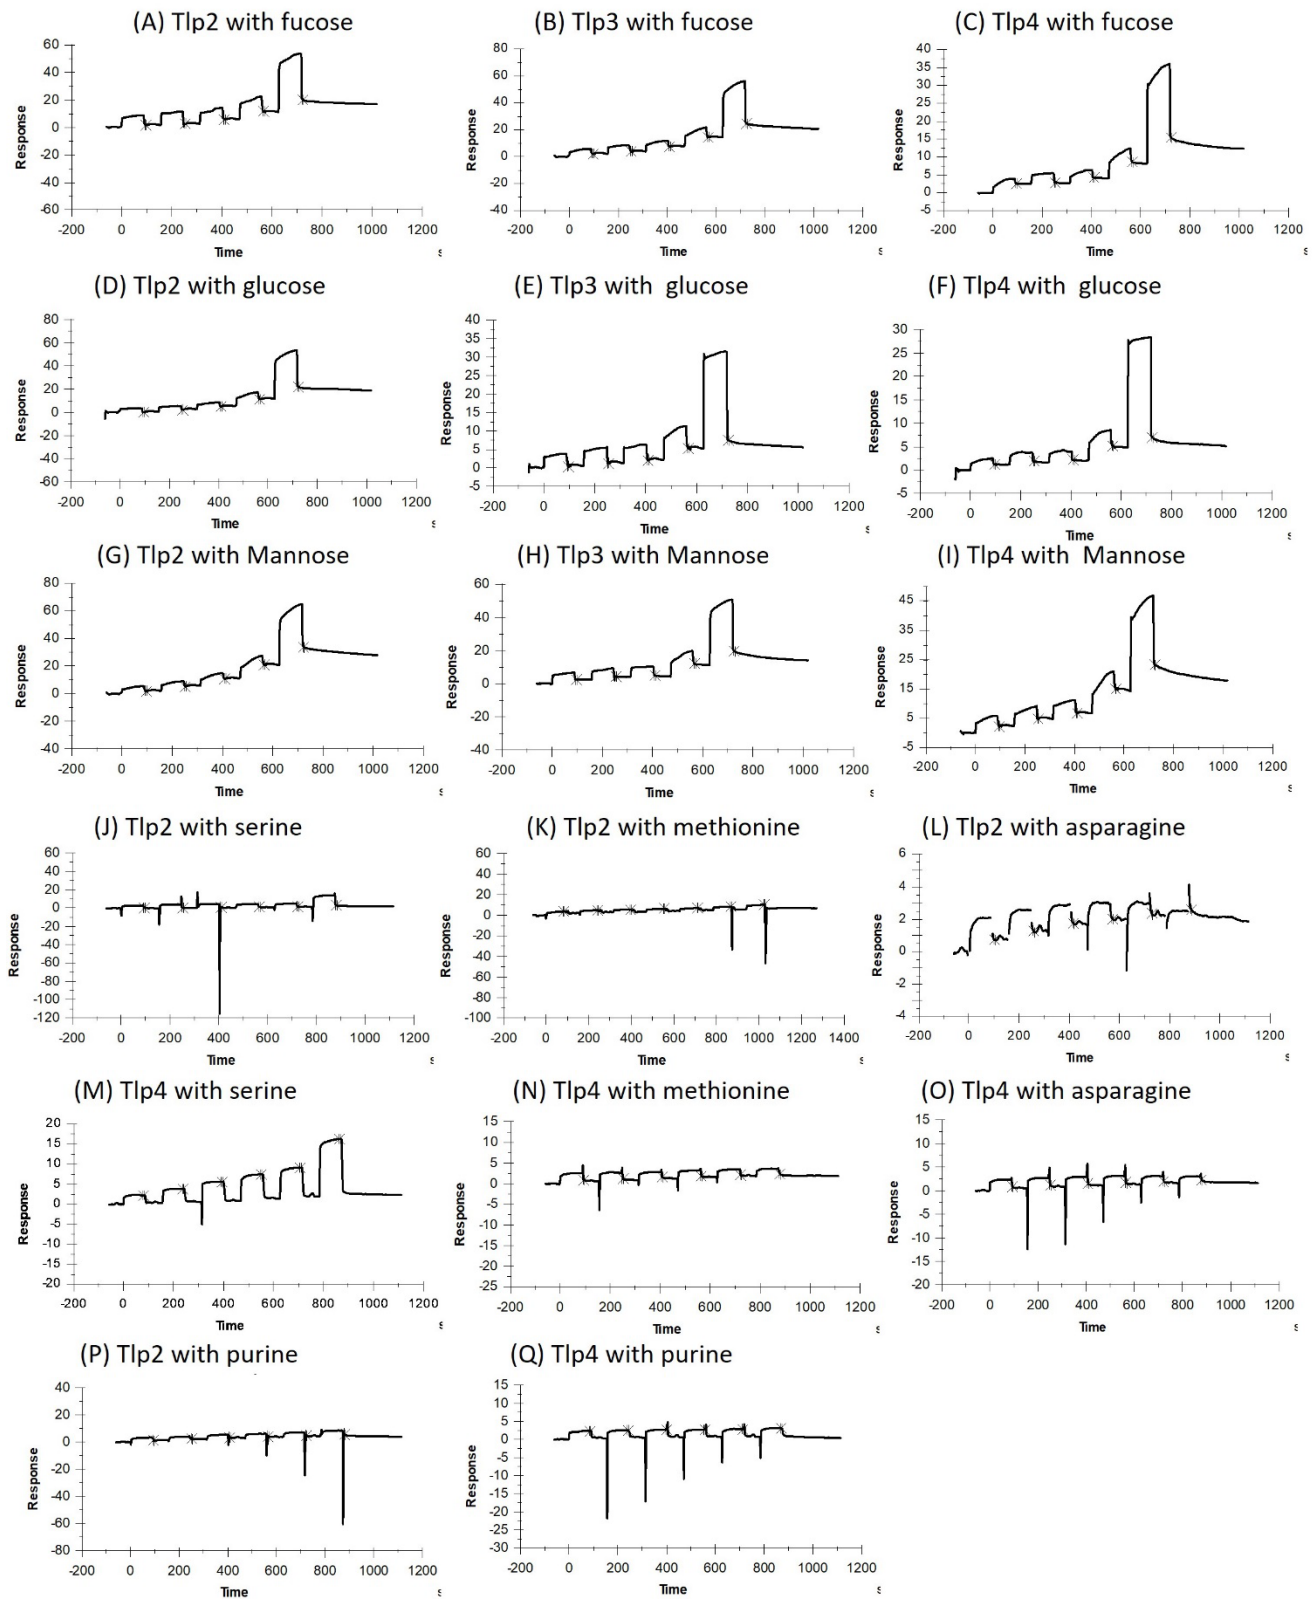

**Figure S6.** Competition between glucose and fucose /glucose and malic acid binding to Tlp3. **A)** Injections are indicated as injection-A (PBS or glucose at 300  $\mu$ M for 30 seconds) and injection-B (glucose at 300  $\mu$ M or fucose at 300  $\mu$ M for 60 seconds). Final responses units (RU) of injections are recorded (indicated by dashed vertical line and label), with the response of glucose equalling  $5.07\text{RU} \pm 0.81$  at 15 seconds after injection-B and fucose equalling  $9.86\text{RU} \pm 1.14$  at 15 seconds after injection-B. The response 15 seconds after injection-B when glucose and fucose were competed was  $4.4\text{RU} \pm 0.46$ . As this value sits below 5 RU, it indicates direct competition for the same site where glucose replacing and blocking the bound fucose during the 60 second injection-B. **B)** Injections are indicated as injection-A (PBS or glucose at 500  $\mu$ M for 30 seconds) and injection-B (glucose at 300  $\mu$ M or malic acid at 200  $\mu$ M for 60 seconds). Final responses units (RU) of injections are recorded (indicated by dashed vertical line and label), with the response of glucose equalling  $5.07\text{RU} \pm 0.81$  at 15 seconds after injection-B and malic acid equalling  $13.5\text{RU} \pm 2.4$  at 15 seconds after injection-B. The response 15 seconds after injection-B when glucose and malic acid were competed was  $10.04\text{RU} \pm 0.66$ . As this value sits between 5.07-13.5 RU, it indicates direct competition for the same site with glucose replacing some of the bound malic acid during the 60 second injection-B.

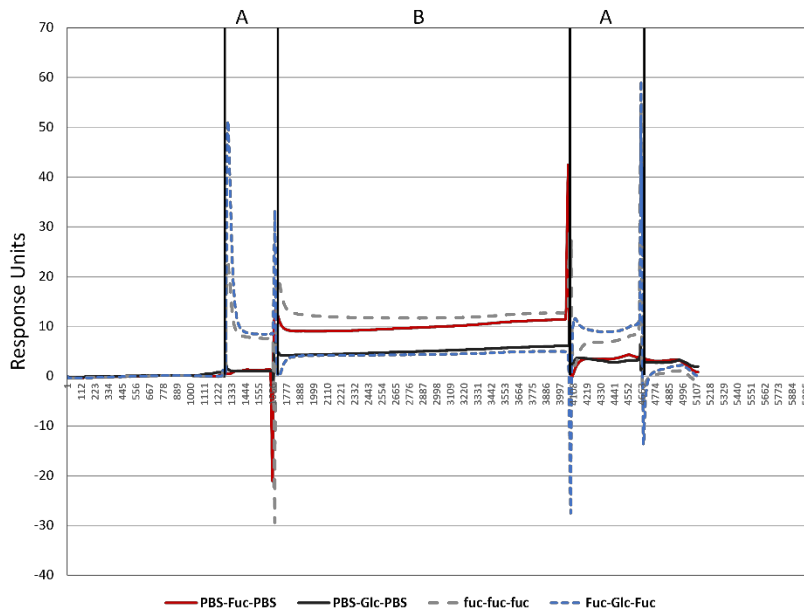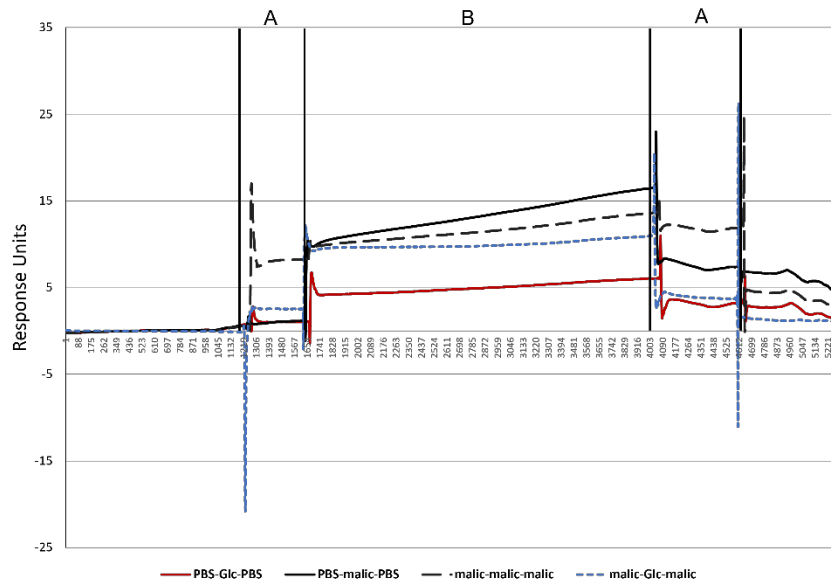



**Figure S7.** SPR ligand competition analysis for Tlp3. SPR competition analysis of binding of glucose (glc),  $\alpha$ -ketoglutarate (aketo), malic acid (malic), lysine (lys), glucosamine (glcA), arginine (arg), and isoleucine (iso) to WT Tlp3<sup>LBD</sup>. The experimental RU value is actual response unit (RU) values for the following: A) (glc) is responses to glucose only, (aketo) is responses to  $\alpha$ -ketoglutarate only, and (glc+aketo) is glucose responses following saturation with  $\alpha$ -ketoglutarate and (aketo+glc) is  $\alpha$ -ketoglutarate following saturation with glucose. B) (glc) is responses to glucose only, (malic) is responses to malic acid only, and (glc+malic) is glucose responses following saturation with malic acid and (malic+glc) is malic acid following saturation with glucose. C) (glc) is responses to glucose only, (lys) is responses to lysine only, and (glc +lys) is glucose responses following saturation with lysine and (lys+glc) is lysine following saturation with glucose. D) (glc) responds to glucose only, (glcA) is response to glucosamine only, (glc+glcA) glucose response following saturation with glucosamine and (glcA+glc) glucosamine following saturation with glucose. E) (iso) is responses to isoleucine only, (arg) is responses to arginine only, and (iso+arg) is isoleucine responses following saturation with arginine and (arg+iso) is arginine following saturation with isoleucine. F) (iso) is responses to isoleucine only, (malic) is responses to malic acid only, and (iso+ malic) is isoleucine responses following saturation with malic acid and (malic +Iso) is malic acid following saturation with isoleucine. G) (iso) is responses to isoleucine only, (lys) is responses to lysine only, and (iso+lys) is isoleucine responses following saturation with lysine and (lys+iso) is lysine following saturation with isoleucine. The theoretical value is responses unites (RU) values based on mathematical theory. The binding status of the ligands to protein are classified as: Independent site (additive/accumulative effect); ligands binding to different binding sites, Shared site; ligands binding/sharing same binding site, Preferential Shared site; ligands binding/sharing same binding site but the protein binds to one ligand better than the other when in equilibrium. All response data was normalized 100 Da molecular weight for each analyte allowing direct comparison of responses.

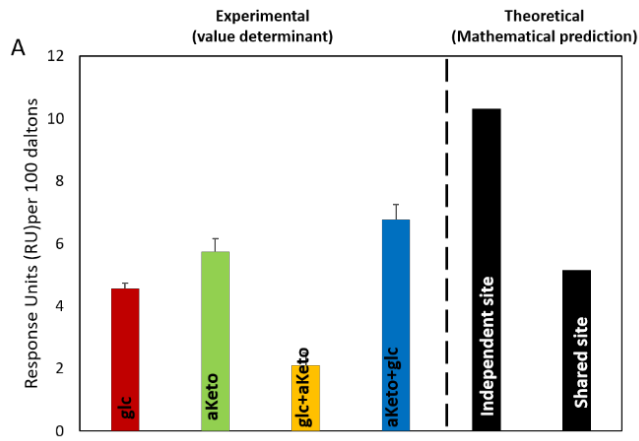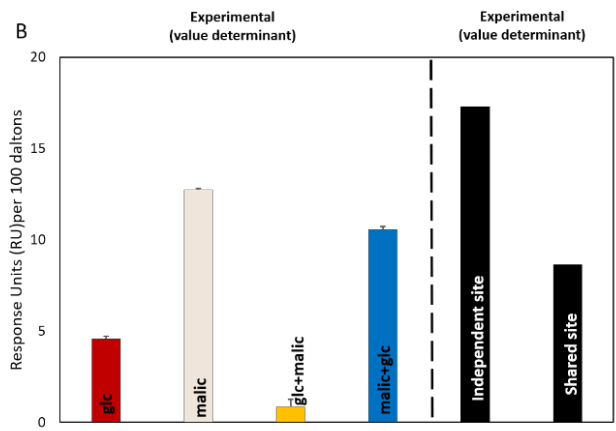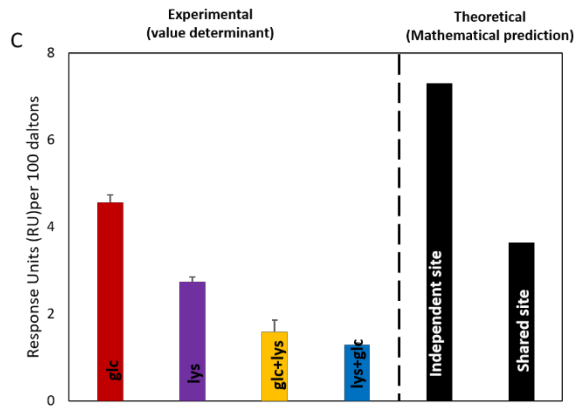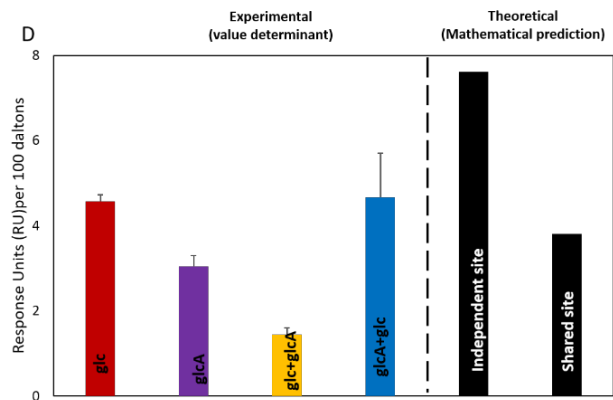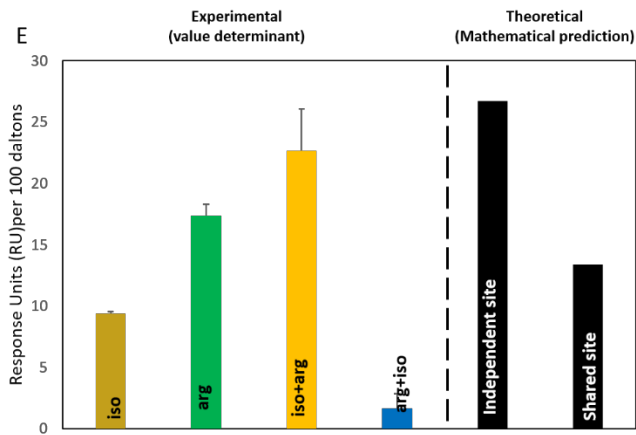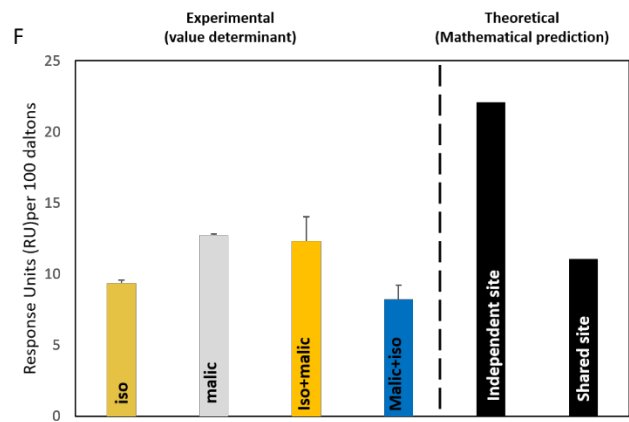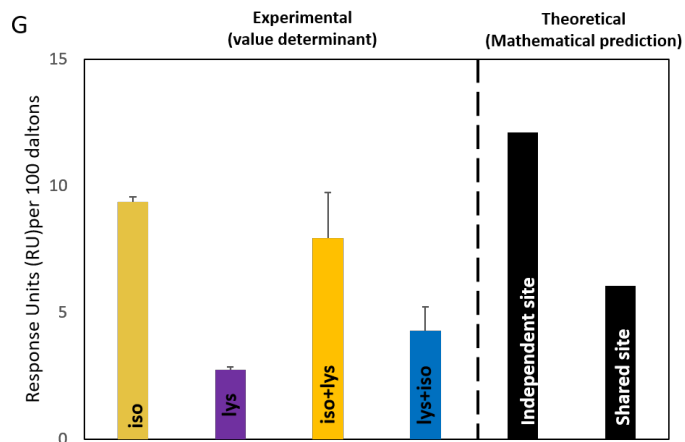

**Figure S8.** Modified hard plug agar assay (tHAP) chemotaxis assay quantitation. Viable counts of *C. jejuni* are shown on a log scale. The agarose plugs contained the following ligands: (A) fucose, glucose, galactose, mannose and sialic acid; (B) serine, methionine, asparagine, lysine, cysteine, purine and aspartate. *C. jejuni* 81116 *flaA*<sup>-</sup>/*flab*<sup>-</sup> isogenic mutant was used as a non-motile, non-chemotactic control; and agar plugs containing no added ligand were used as a negative control. Standard errors are shown as bars above the mean of three replicates.

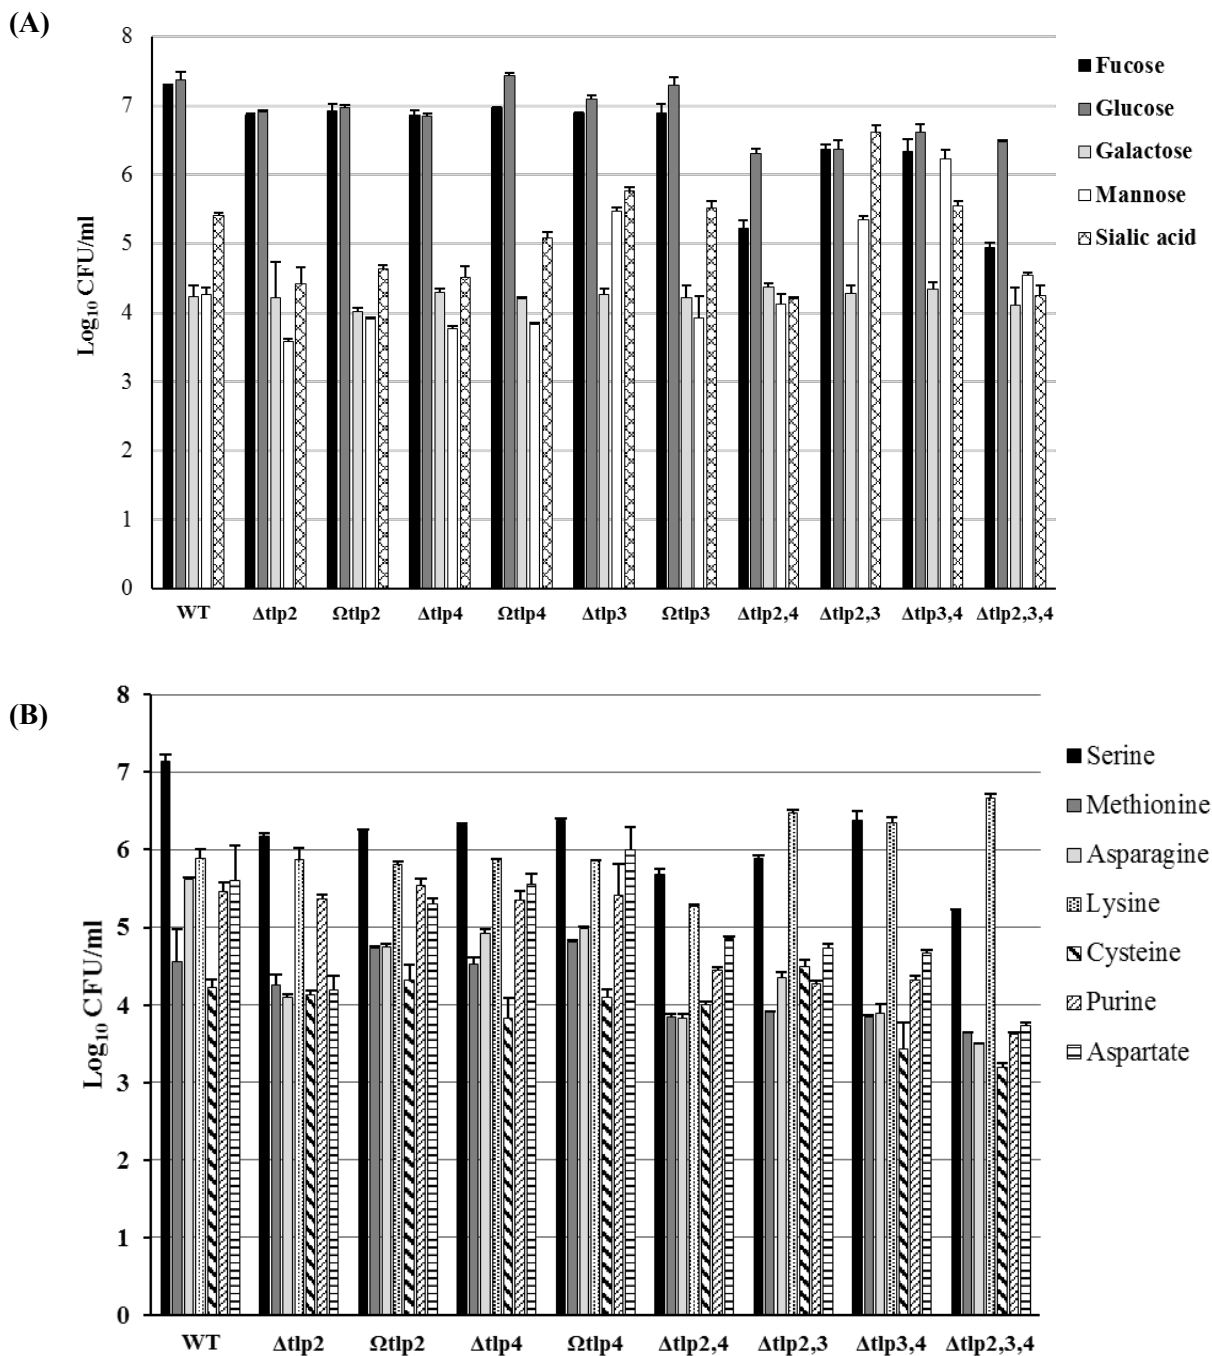

**Figure S9.** Circular dichroism spectrometry analyses of periplasmic domains of **(A)** Tlp2, **(B)** Tlp3 and **(C)** Tlp4. Molar ellipticity  $[\theta]$  is calculated using the formula:  $(\theta \times 100 \times M)/(C \times l \times n)$ . Purified Tlp2, Tlp3 and Tlp4 were confirmed as folded proteins consisting of  $\alpha$ -helix structures.

**(A) Tlp2**

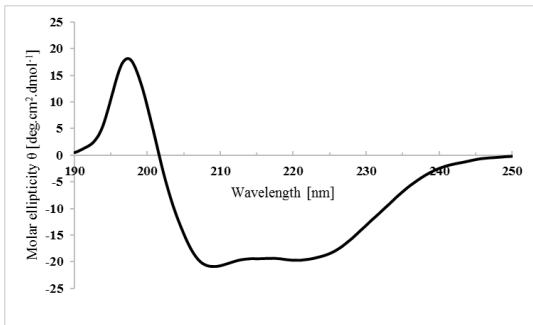

**(B) Tlp3**

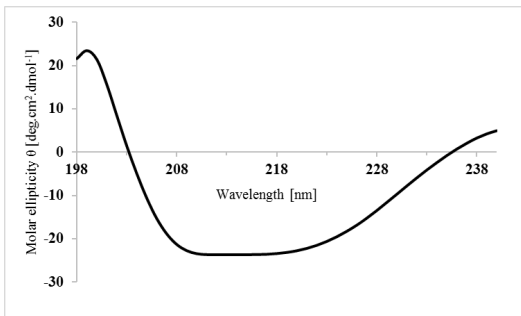

**(C) Tlp4**

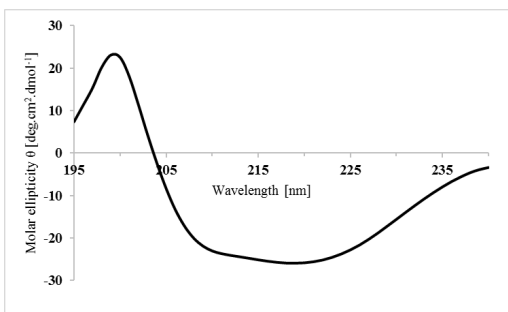

**Videos S1.** Molecular dynamics simulations between two molecules, a monosaccharide (glucose) and an amino acid (arginine).

**Videos S2.** Molecular dynamics simulations between two molecules, an amino acid (arginine) and a monosaccharide (glucose).

**Table S1.** The presence of dCache\_1 domain containing chemoreceptors in different *Campylobacterota* representatives.

| Phylum                    | Class | Order | Family          | Genus                                | GTDB Species name | Representative genome                   | NCBI name                                     | MiST ID        | NCBI ID                                          |
|---------------------------|-------|-------|-----------------|--------------------------------------|-------------------|-----------------------------------------|-----------------------------------------------|----------------|--------------------------------------------------|
| <b>p_Campylobacterota</b> |       |       |                 |                                      |                   |                                         |                                               |                |                                                  |
| c_Campylobacteria         |       |       |                 |                                      |                   |                                         |                                               |                |                                                  |
| o_Campylobacteriales      |       |       |                 |                                      |                   |                                         |                                               |                |                                                  |
| f_Arcobacteraceae         |       |       |                 |                                      |                   |                                         |                                               |                |                                                  |
|                           |       |       | Aliarcobacter   | <i>Arcobacter butzleri</i>           | GCF_001010585.1   | <i>Arcobacter butzleri</i> L348         |                                               |                | F7 system, 36H                                   |
|                           |       |       | Arcobacter      | <i>Arcobacter nitrofigilis</i>       | GCF_00009245.1    | <i>Arcobacter nitrofigilis</i> DSM 7299 | <a href="#">GCF_000092245.1-ARNIT_RS12945</a> | WP_013136383.1 | F7 system, <b>36H</b>                            |
|                           |       |       |                 |                                      |                   |                                         | <a href="#">GCF_000092245.1-ARNIT_RS10155</a> | WP_013135839.1 |                                                  |
|                           |       |       |                 |                                      |                   |                                         | <a href="#">GCF_000092245.1-ARNIT_RS04225</a> | WP_013134649.1 |                                                  |
|                           |       |       |                 |                                      |                   |                                         | <a href="#">GCF_000092245.1-ARNIT_RS15045</a> | WP_013136785.1 |                                                  |
|                           |       |       |                 |                                      |                   |                                         | <a href="#">GCF_000092245.1-ARNIT_RS03330</a> | WP_013134476.1 |                                                  |
|                           |       |       | Halarcobacter   | <i>Halarcobacter anaerophilus</i>    | GCF_000935065.1   | <i>Arcobacter anaerophilus</i>          | <a href="#">GCF_000935065.1-TN41_RS08535</a>  | WP_044417424.1 | F7 system, <b>36H</b>                            |
|                           |       |       |                 |                                      |                   |                                         | <a href="#">GCF_000935065.1-TN41_RS03965</a>  | WP_044415828.1 |                                                  |
|                           |       |       | Malaciobacter   | <i>Malaciobacter canalis</i>         | GCF_002723485.1   | <i>Arcobacter canalis</i>               | <a href="#">GCF_002723485.1-CPG37_RS07870</a> | WP_099334512.1 | F7 system, F9 system, 34H, <b>36H</b> , 40H, 44H |
|                           |       |       |                 |                                      |                   |                                         | <a href="#">GCF_002723485.1-CPG37_RS13415</a> | WP_099335382.1 |                                                  |
|                           |       |       |                 |                                      |                   |                                         | <a href="#">GCF_002723485.1-CPG37_RS01535</a> | WP_099333483.1 |                                                  |
|                           |       |       |                 |                                      |                   |                                         | <a href="#">GCF_002723485.1-CPG37_RS10520</a> | WP_099334924.1 |                                                  |
|                           |       |       |                 |                                      |                   |                                         | <a href="#">GCF_002723485.1-CPG37_RS10515</a> | WP_099334923.1 |                                                  |
|                           |       |       |                 |                                      |                   |                                         | <a href="#">GCF_002723485.1-CPG37_RS12925</a> | WP_099335312.1 |                                                  |
|                           |       |       | Poseidonibacter | <i>Poseidonibacter lekithochrous</i> | GCF_001878855.1   | <i>Arcobacter lekithochrous</i>         | <a href="#">GCF_001878855.1-BRO21_RS12110</a> | WP_071627413.1 | F7 system, F8 system, 34H, <b>36H</b>            |
|                           |       |       |                 |                                      |                   |                                         | <a href="#">GCF_001878855.1-BRO21_RS15155</a> | WP_071628011.1 |                                                  |
|                           |       |       |                 |                                      |                   |                                         | <a href="#">GCF_001878855.1-BRO21_RS08205</a> | WP_083574630.1 |                                                  |
|                           |       |       |                 |                                      |                   |                                         | <a href="#">GCF_001878855.1-BRO21_RS05035</a> | WP_071625985.1 |                                                  |

| f_Campylobacteraceae              |                 |                                     |                                                   |                |                                       |  |
|-----------------------------------|-----------------|-------------------------------------|---------------------------------------------------|----------------|---------------------------------------|--|
| Campylobacter                     |                 |                                     |                                                   |                |                                       |  |
| <i>Campylobacter fetus</i>        | GCF_900475935.1 | <i>Campylobacter fetus</i>          | <a href="#">GCF_900475935.1-DQN38_RS08290</a>     | WP_011732310.1 | F3 system; 24H, <b>28H</b> , 40H, 44H |  |
|                                   |                 |                                     | <a href="#">GCF_900475935.1-DQN38_RS06385</a>     | WP_041738387.1 |                                       |  |
|                                   |                 |                                     | <a href="#">GCF_900475935.1-DQN38_RS06380</a>     | WP_111738221.1 |                                       |  |
|                                   |                 |                                     | <a href="#">GCF_900475935.1-DQN38_RS00960</a>     | WP_011731731.1 |                                       |  |
| <i>Campylobacter iguaniorum</i>   | GCF_000736415.1 | <i>Campylobacter iguaniorum</i>     | <a href="#">GCF_000736415.1-CIG1485E_RS09305</a>  | WP_038455260.1 | F3 system; <b>28H</b> , 40H           |  |
|                                   |                 |                                     | <a href="#">GCF_000736415.1-CIG1485E_RS09275</a>  | WP_069107390.1 |                                       |  |
| <i>Campylobacter lanienae</i>     | GCF_002139415.1 | <i>Campylobacter lanienae</i>       | <a href="#">GCF_002139415.1-CCB79_RS06750</a>     | WP_096025340.1 | F3 system; <b>28H</b> , 40H, 44H      |  |
| <i>Campylobacter sp002139855</i>  | GCF_002139855.1 | <i>Campylobacter sp. RM6137</i>     | <a href="#">GCF_002139855.1-CSUIS_RS06325</a>     | WP_086298008.1 | F3 system; <b>28H</b> , 40H           |  |
|                                   |                 |                                     | <a href="#">GCF_002139855.1-CSUIS_RS00300</a>     | WP_086296673.1 |                                       |  |
| <i>Campylobacter sp002139875</i>  | GCF_002139875.1 | <i>Campylobacter sp. RM12175</i>    | <a href="#">GCF_002139875.1-CVIC12175_RS06330</a> | WP_086315930.1 | F3 system; <b>28H</b> , 40H, 44H      |  |
|                                   | GCF_002139175.1 | <i>Campylobacter sp. RM9262</i>     | <a href="#">GCF_002139175.1-CVIC9262_RS00905</a>  | WP_086256599.1 | F3 system; <b>28H</b> , 40H, 44H      |  |
| <i>Campylobacter sp002139915</i>  | GCF_002139915.1 | <i>Campylobacter sp. NCTC 13003</i> | <a href="#">GCF_002139915.1-CIGN_RS01655</a>      | WP_086302052.1 | F3 system; <b>28H</b> , 40H           |  |
|                                   |                 |                                     | <a href="#">GCF_002139915.1-CIGN_RS01725</a>      | WP_086302056.1 |                                       |  |
| Campylobacter_A                   |                 |                                     |                                                   |                |                                       |  |
| <i>Campylobacter_A concisus</i>   | GCF_001298465.1 | <i>Campylobacter concisus</i>       | <a href="#">GCF_001298465.1-CCON33237_RS03260</a> | WP_054196374.1 | F3 system, <b>28H</b> , 40H           |  |
|                                   |                 |                                     | <a href="#">GCF_001298465.1-CCON33237_RS03255</a> | WP_054196373.1 |                                       |  |
| <i>Campylobacter_A concisus_N</i> | GCF_002914005.1 | <i>Campylobacter concisus</i>       | <a href="#">GCF_002914005.1-CYP54_RS07185</a>     | WP_103600989.1 | F3 system, <b>28H</b> , 40H           |  |
|                                   |                 |                                     | <a href="#">GCF_002914005.1-CYP54_RS07180</a>     | WP_103604731.1 |                                       |  |
| <i>Campylobacter_A concisus_U</i> | GCF_003048575.1 | <i>Campylobacter concisus</i>       | <a href="#">GCF_003048575.1-CVS84_RS01985</a>     | WP_107690942.1 | F3 system, <b>28H</b> , 40H           |  |

|                                      |                 |                                                         |                                                   |                |                                          |
|--------------------------------------|-----------------|---------------------------------------------------------|---------------------------------------------------|----------------|------------------------------------------|
| <i>Campylobacter_A pinnipediorum</i> | GCF_002021925.1 | <i>Campylobacter pinnipediorum subsp. Pinnipediorum</i> | <a href="#">GCF_002021925.1-CPIN17260_RS08940</a> | WP_078406295.1 | F3 system, <b>28H</b> , 40H              |
|                                      |                 |                                                         | <a href="#">GCF_002021925.1-CPIN17260_RS00765</a> | WP_099046649.1 |                                          |
|                                      |                 |                                                         | <a href="#">GCF_002021925.1-CPIN17260_RS00760</a> | WP_078440405.1 |                                          |
| <i>Campylobacter_A rectus</i>        | GCF_000174175.1 | <i>Campylobacter rectus RM3267</i>                      | <a href="#">GCF_000174175.1-CAMRE0001_RS08300</a> | WP_002944978.1 | F3 system, <b>28H</b> , 40H              |
|                                      |                 |                                                         | <a href="#">GCF_000174175.1-CAMRE0001_RS11105</a> | WP_002945855.1 |                                          |
| <i>Campylobacter_A showae_A</i>      | GCF_000313615.1 | <i>Campylobacter showae CSUNSWC D</i>                   | <a href="#">GCF_000313615.1-CSUNSWCD_RS08695</a>  | WP_009495943.1 | F3 system, <b>28H</b> , 40H              |
| Campylobacter B                      |                 |                                                         |                                                   |                |                                          |
| <i>Campylobacter_B sputorum</i>      | GCF_002220755.1 | <i>Campylobacter sputorum bv. paraureolyticus</i>       | <a href="#">GCF_002220755.1-CSPARA_RS08305</a>    | WP_089189895.1 | F3 system, <b>28H</b> , <b>40H</b> , 44H |
|                                      |                 |                                                         | <a href="#">GCF_002220755.1-CSPARA_RS05480</a>    | WP_089189193.1 |                                          |
|                                      |                 |                                                         | <a href="#">GCF_002220755.1-CSPARA_RS01695</a>    | WP_089189023.1 |                                          |
|                                      |                 |                                                         | <a href="#">GCF_002220755.1-CSPARA_RS05130</a>    | WP_089189502.1 |                                          |
|                                      |                 |                                                         | <a href="#">GCF_002220755.1-CSPARA_RS07910</a>    | WP_089189836.1 | 40H                                      |
|                                      |                 |                                                         | <a href="#">GCF_002220755.1-CSPARA_RS04765</a>    | WP_089189445.1 | 40H                                      |
| Campylobacter D                      |                 |                                                         |                                                   |                |                                          |
| <i>Campylobacter_D avium</i>         | GCF_002238335.1 | <i>Campylobacter avium LMG 24591</i>                    | <a href="#">GCF_002238335.1-CAV_RS08355</a>       | WP_094324384.1 | F3 system, <b>28H</b> , 40H, 44H         |
|                                      |                 |                                                         | <a href="#">GCF_002238335.1-CAV_RS07060</a>       | WP_094325829.1 |                                          |
|                                      |                 |                                                         | <a href="#">GCF_002238335.1-CAV_RS01035</a>       | WP_094324668.1 |                                          |
|                                      |                 |                                                         | <a href="#">GCF_002238335.1-CAV_RS00955</a>       | WP_094324654.1 |                                          |
|                                      |                 |                                                         | <a href="#">GCF_002238335.1-CAV_RS07455</a>       | WP_094325897.1 |                                          |
|                                      |                 |                                                         | <a href="#">GCF_002238335.1-CAV_RS00870</a>       | WP_094325509.1 |                                          |



|                                    |                     |                                                                       |                                                   |                    |                                  |
|------------------------------------|---------------------|-----------------------------------------------------------------------|---------------------------------------------------|--------------------|----------------------------------|
|                                    | GCF_002245<br>935.1 | <i>Campylobacter avium</i>                                            | <a href="#">GCF_002245935.1-CAV8706_RS07895</a>   | WP_094325<br>829.1 | F3 system, <b>28H</b> , 40H, 44H |
|                                    |                     |                                                                       | <a href="#">GCF_002245935.1-CAV8706_RS01820</a>   | WP_094324<br>654.1 |                                  |
|                                    |                     |                                                                       | <a href="#">GCF_002245935.1-CAV8706_RS04075</a>   | WP_094325<br>072.1 |                                  |
|                                    |                     |                                                                       | <a href="#">GCF_002245935.1-CAV8706_RS01900</a>   | WP_094324<br>668.1 |                                  |
|                                    |                     |                                                                       | <a href="#">GCF_002245935.1-CAV8706_RS00375</a>   | WP_094324<br>384.1 |                                  |
|                                    |                     |                                                                       | <a href="#">GCF_002245935.1-CAV8706_RS01735</a>   | WP_094325<br>509.1 |                                  |
|                                    |                     |                                                                       | <a href="#">GCF_002245935.1-CAV8706_RS08285</a>   | WP_094325<br>897.1 |                                  |
| <i>Campylobacter_D cunicolorum</i> | GCF_002104<br>335.1 | RS<br><i>Campylobacter cunicolorum</i><br>DSM 23162<br>= LMG<br>24588 | <a href="#">GCF_002104335.1-CCUN_RS08200</a>      | WP_085296<br>680.1 | F3 system, <b>28H</b> , 40H      |
|                                    |                     |                                                                       | <a href="#">GCF_002104335.1-CCUN_RS06815</a>      | WP_027305<br>900.1 |                                  |
|                                    |                     |                                                                       | <a href="#">GCF_002104335.1-CCUN_RS09175</a>      | WP_085296<br>688.1 |                                  |
|                                    |                     |                                                                       | <a href="#">GCF_002104335.1-CCUN_RS00300</a>      | WP_085296<br>593.1 |                                  |
|                                    | GCF_000621<br>005.1 | <i>Campylobacter cunicolorum</i><br>DSM 23162<br>= LMG<br>24588       | <a href="#">GCF_000621005.1-Q330_RS0106010</a>    | WP_027305<br>900.1 | F3 system, <b>28H</b> , 40H      |
|                                    |                     |                                                                       | <a href="#">GCF_000621005.1-Q330_RS0105540</a>    | WP_051521<br>714.1 |                                  |
|                                    |                     |                                                                       | <a href="#">GCF_000621005.1-Q330_RS0100570</a>    | WP_027304<br>962.1 |                                  |
| <i>Campylobacter_D helveticus</i>  | GCF_002080<br>395.1 | <i>Campylobacter helveticus</i><br>ATCC<br>51209                      | <a href="#">GCF_002080395.1-CHELV3228_RS00050</a> | WP_082200<br>713.1 | F3 system, <b>28H</b> , 40H, 44H |
|                                    |                     |                                                                       | <a href="#">GCF_002080395.1-CHELV3228_RS09175</a> | WP_082200<br>691.1 |                                  |
|                                    |                     |                                                                       | <a href="#">GCF_002080395.1-CHELV3228_RS01550</a> | WP_082199<br>230.1 |                                  |
|                                    |                     |                                                                       | <a href="#">GCF_002080395.1-CHELV3228_RS08180</a> | WP_082200<br>520.1 |                                  |

|                                    |                 |                                            |                                               |                |                                  |
|------------------------------------|-----------------|--------------------------------------------|-----------------------------------------------|----------------|----------------------------------|
| <i>Campylobacter_D upsaliensis</i> | GCF_000167395.1 | <i>Campylobacter upsaliensis</i><br>RM3195 | <a href="#">GCF_000167395.1-CUP_RS03190</a>   | WP_004275314.1 | F3 system, <b>28H</b> , 40H, 44H |
|                                    |                 |                                            | <a href="#">GCF_000167395.1-CUP_RS03010</a>   | WP_004275277.1 |                                  |
|                                    |                 |                                            | <a href="#">GCF_000167395.1-CUP_RS03665</a>   | WP_004275415.1 |                                  |
|                                    |                 |                                            | <a href="#">GCF_000167395.1-CUP_RS05805</a>   | WP_004275846.1 |                                  |
| <i>Campylobacter_D sp002738235</i> | GCF_002738235.1 | <i>Campylobacter sp. 73/13</i>             |                                               |                | F3 system, 40H, 44H              |
| <i>Campylobacter_D hepaticus</i>   | GCF_001687475.1 | <i>Campylobacter hepaticus</i>             | <a href="#">GCF_001687475.1-A2J15_RS07055</a> | WP_066779406.1 | F3 system, <b>28H</b> , 40H      |
| <i>Campylobacter_D jejuni_B</i>    | GCF_002179165.1 | <i>Campylobacter jejuni W1</i>             |                                               |                | F3 system, 28H, 40H, 44H         |
| <i>Campylobacter_D coli</i>        | GCF_000465235.1 | <i>Campylobacter coli</i><br>CVM<br>N29710 | <a href="#">GCF_000465235.1-G157_RS01370</a>  | WP_002822567.1 | F3 system, <b>28H</b> , 40H      |
|                                    |                 |                                            | <a href="#">GCF_000465235.1-G157_RS01095</a>  | WP_021033641.1 |                                  |
|                                    |                 |                                            | <a href="#">GCF_000465235.1-G157_RS07430</a>  | WP_021033778.1 |                                  |
|                                    | GCF_000465235.1 | <i>Campylobacter coli</i><br>CVM<br>N29710 | <a href="#">GCF_000465235.1-G157_RS01370</a>  | WP_002822567.1 | F3 system, <b>28H</b> , 40H      |
|                                    |                 |                                            | <a href="#">GCF_000465235.1-G157_RS01095</a>  | WP_021033641.1 |                                  |
|                                    |                 |                                            | <a href="#">GCF_000465235.1-G157_RS07430</a>  | WP_021033778.1 |                                  |
|                                    | GCF_000583795.1 | <i>Campylobacter coli</i><br>RM5611        | <a href="#">GCF_000583795.1-YSU_RS08010</a>   | WP_025431530.1 | F3 system, <b>28H</b> , 40H      |
|                                    |                 |                                            | <a href="#">GCF_000583795.1-YSU_RS01055</a>   | WP_025431485.1 |                                  |
|                                    |                 |                                            | <a href="#">GCF_000583795.1-YSU_RS07490</a>   | WP_025431528.1 |                                  |
|                                    | GCF_000954195.1 | <i>Campylobacter coli</i>                  | <a href="#">GCF_000954195.1-VC76_RS07390</a>  | WP_002822567.1 | F3 system, <b>28H</b> , 40H      |
|                                    |                 |                                            | <a href="#">GCF_000954195.1-VC76_RS07950</a>  | WP_045243712.1 |                                  |
|                                    |                 |                                            | <a href="#">GCF_000954195.1-VC76_RS07680</a>  | WP_045243711.1 |                                  |
|                                    |                 |                                            | <a href="#">GCF_000954195.1-VC76_RS01340</a>  | WP_021033778.1 |                                  |

|                                                |                             |                                                                                                                                          |                                                                                                                                                                                                                                                                       |                                                                                                            |                             |
|------------------------------------------------|-----------------------------|------------------------------------------------------------------------------------------------------------------------------------------|-----------------------------------------------------------------------------------------------------------------------------------------------------------------------------------------------------------------------------------------------------------------------|------------------------------------------------------------------------------------------------------------|-----------------------------|
| <i>Campylobacter</i><br><i>D coli</i> <i>A</i> | GCF_000470<br>055.1         | <i>Campylobacter</i><br><i>coli</i><br>76339                                                                                             | <a href="#">GCF_000470055.1-<br/>BN865_RS01275</a>                                                                                                                                                                                                                    | WP_020973<br>958.1                                                                                         | F3 system, <b>28H</b> , 40H |
|                                                | GCF_001498<br>475.1         | <i>Campylobacter</i><br><i>coli</i>                                                                                                      | <a href="#">GCF_001498475.1-<br/>AV450_RS02685</a>                                                                                                                                                                                                                    | WP_075504<br>589.1                                                                                         | F3 system, <b>28H</b> , 40H |
|                                                | GCF_001494<br>895.1         | <i>Campylobacter</i><br><i>coli</i>                                                                                                      | <a href="#">GCF_001494895.1-<br/>AV288_RS04180</a>                                                                                                                                                                                                                    | WP_075482<br>578.1                                                                                         | F3 system, <b>28H</b> , 40H |
| <i>Campylobacter</i><br><i>D coli</i> <i>B</i> | GCF_001492<br>295.1         | <i>Campylobacter</i><br><i>coli</i>                                                                                                      | <a href="#">GCF_001492295.1-<br/>AV154_RS00980</a><br><a href="#">GCF_001492295.1-<br/>AV154_RS08260</a>                                                                                                                                                              | WP_058968<br>202.1<br>WP_058969<br>565.1                                                                   | F3 system, <b>28H</b> , 40H |
|                                                | GCF_002019<br>865.1         | <i>Campylobacter</i><br><i>coli</i>                                                                                                      | <a href="#">GCF_002019865.1-<br/>BOQ00_RS06585</a><br><a href="#">GCF_002019865.1-<br/>BOQ00_RS08225</a>                                                                                                                                                              | WP_078416<br>234.1<br>WP_078416<br>353.1                                                                   | F3 system, <b>28H</b> , 40H |
|                                                | GCF_002020<br>015.1         | <i>Campylobacter</i><br><i>coli</i> <i>VA8</i>                                                                                           | <a href="#">GCF_002020015.1-<br/>BOP99_RS05705</a><br><a href="#">GCF_002020015.1-<br/>BOP99_RS05315</a><br><a href="#">GCF_002020015.1-<br/>BOP99_RS00005</a>                                                                                                        | WP_075447<br>212.1<br>WP_052774<br>443.1<br>WP_075481<br>750.1                                             | F3 system, <b>28H</b> , 40H |
| <i>Campylobacter</i><br><i>D jejuni</i>        | <b>GCF_000009<br/>085.1</b> | <i>Campylobacter</i><br><i>jejuni</i><br><i>subsp.</i><br><i>jejuni</i><br><i>NCTC</i><br><i>11168</i> =<br><i>ATCC</i><br><i>700819</i> | <a href="#">GCF_000009085.1-Cj1506c</a>                                                                                                                                                                                                                               | <b>YP_0023448<br/>85.1</b>                                                                                 | F3 system, <b>28H</b> , 40H |
|                                                |                             |                                                                                                                                          | <a href="#">GCF_000009085.1-Cj0144</a>                                                                                                                                                                                                                                | <b>YP_0023436<br/>04.1</b>                                                                                 |                             |
|                                                |                             |                                                                                                                                          | <a href="#">GCF_000009085.1-Cj1564</a>                                                                                                                                                                                                                                | <b>YP_0023449<br/>33.1</b>                                                                                 |                             |
|                                                |                             |                                                                                                                                          | <a href="#">GCF_000009085.1-Cj0262c</a>                                                                                                                                                                                                                               | <b>YP_0023437<br/>04.1</b>                                                                                 |                             |
|                                                | GCF_000835<br>285.1         | <i>Campylobacter</i><br><i>jejuni</i><br><i>subsp.</i> <i>jejuni</i>                                                                     | <a href="#">GCF_000835285.1-<br/>PJ17_RS07875</a><br><a href="#">GCF_000835285.1-<br/>PJ17_RS00730</a><br><a href="#">GCF_000835285.1-<br/>PJ17_RS08150</a><br><a href="#">GCF_000835285.1-<br/>PJ17_RS01290</a><br><a href="#">GCF_000835285.1-<br/>PJ17_RS01300</a> | WP_002858<br>883.1<br>WP_079394<br>622.1<br>WP_079394<br>630.1<br>WP_042635<br>812.1<br>WP_042635<br>814.1 | F3 system, <b>28H</b> , 40H |
|                                                | GCF_002209<br>045.1         | <i>Campylobacter</i><br><i>jejuni</i><br><i>subsp.</i> <i>jejuni</i>                                                                     | <a href="#">GCF_002209045.1-<br/>A6J93_RS07640</a><br><a href="#">GCF_002209045.1-<br/>A6J93_RS00985</a>                                                                                                                                                              | WP_002871<br>853.1<br>WP_079460<br>163.1                                                                   | F3 system, <b>28H</b> , 40H |

|                                      |                     |                                                         |                                                 |                    |                                  |
|--------------------------------------|---------------------|---------------------------------------------------------|-------------------------------------------------|--------------------|----------------------------------|
|                                      |                     |                                                         | <a href="#">GCF_002209045.1-A6J93_RS07895</a>   | WP_088585<br>164.1 |                                  |
|                                      |                     |                                                         | <a href="#">GCF_002209045.1-A6J93_RS01525</a>   | WP_088585<br>119.1 |                                  |
|                                      | GCF_003060<br>745.1 | <i>Campylobacter jejuni</i>                             | <a href="#">GCF_003060745.1-CJ12660_RS07665</a> | WP_002851<br>362.1 | F3 system, <b>28H</b> , 40H      |
|                                      |                     |                                                         | <a href="#">GCF_003060745.1-CJ12660_RS07910</a> | WP_108592<br>625.1 |                                  |
|                                      |                     |                                                         | <a href="#">GCF_003060745.1-CJ12660_RS00720</a> | WP_108592<br>594.1 |                                  |
|                                      |                     |                                                         | <a href="#">GCF_003060745.1-CJ12660_RS01265</a> | WP_021036<br>342.1 |                                  |
|                                      | GCF_000835<br>345.1 | <i>Campylobacter jejuni</i><br><i>subsp. jejuni</i>     | <a href="#">GCF_000835345.1-PJ19_RS08250</a>    | WP_002851<br>362.1 | F3 system, <b>28H</b> , 40H      |
|                                      |                     |                                                         | <a href="#">GCF_000835345.1-PJ19_RS00730</a>    | WP_079394<br>712.1 |                                  |
|                                      |                     |                                                         | <a href="#">GCF_000835345.1-PJ19_RS08495</a>    | WP_079394<br>745.1 |                                  |
|                                      |                     |                                                         | <a href="#">GCF_000835345.1-PJ19_RS01250</a>    | WP_009881<br>974.1 |                                  |
| <i>Campylobacter_D insulaenigrae</i> | GCF_000816<br>185.1 | <i>Campylobacter insulaenigrae</i><br><i>NCTC 12927</i> | <a href="#">GCF_000816185.1-CINS_RS06385</a>    | WP_039650<br>838.1 | F3 system, <b>28H</b> , 40H, 44H |
|                                      |                     |                                                         | <a href="#">GCF_000816185.1-CINS_RS07375</a>    | WP_039651<br>184.1 |                                  |
|                                      |                     |                                                         | <a href="#">GCF_000816185.1-CINS_RS00645</a>    | WP_084593<br>975.1 |                                  |
|                                      |                     |                                                         | <a href="#">GCF_000816185.1-CINS_RS05400</a>    | WP_039650<br>514.1 |                                  |
|                                      |                     |                                                         | <a href="#">GCF_000816185.1-CINS_RS01075</a>    | WP_039649<br>119.1 |                                  |
| <i>Campylobacter_D volucris</i>      | GCF_000816<br>345.1 | <i>Campylobacter volucris</i><br><i>LMG 24379</i>       | <a href="#">GCF_000816345.1-CVOL_RS07670</a>    | WP_039666<br>183.1 | F3 system, <b>28H</b> , 40H, 44H |
|                                      |                     |                                                         | <a href="#">GCF_000816345.1-CVOL_RS07665</a>    | WP_039666<br>182.1 |                                  |
|                                      |                     |                                                         | <a href="#">GCF_000816345.1-CVOL_RS06585</a>    | WP_039666<br>017.1 |                                  |
|                                      |                     |                                                         | <a href="#">GCF_000816345.1-CVOL_RS05505</a>    | WP_039665<br>826.1 |                                  |
|                                      |                     |                                                         | <a href="#">GCF_000816345.1-CVOL_RS00675</a>    | WP_039664<br>987.1 |                                  |
| <i>Campylobacter_D peloridis</i>     | GCF_000816<br>785.1 | <i>Campylobacter peloridis</i><br><i>LMG 23910</i>      | <a href="#">GCF_000816785.1-CPEL_RS08275</a>    | WP_044599<br>430.1 | F3 system, <b>28H</b> , 40H      |
|                                      |                     |                                                         | <a href="#">GCF_000816785.1-CPEL_RS07205</a>    | WP_044599<br>248.1 |                                  |

|                                                 |                     |                                                                                          |                                                  |                    |                                  |
|-------------------------------------------------|---------------------|------------------------------------------------------------------------------------------|--------------------------------------------------|--------------------|----------------------------------|
|                                                 |                     |                                                                                          | <a href="#">GCF_000816785.1-CPEL_RS06215</a>     | WP_044599<br>069.1 |                                  |
|                                                 |                     |                                                                                          | <a href="#">GCF_000816785.1-CPEL_RS06210</a>     | WP_044599<br>575.1 |                                  |
|                                                 |                     |                                                                                          | <a href="#">GCF_000816785.1-CPEL_RS06205</a>     | WP_044599<br>068.1 |                                  |
|                                                 |                     |                                                                                          | <a href="#">GCF_000816785.1-CPEL_RS00725</a>     | WP_044599<br>464.1 |                                  |
|                                                 |                     |                                                                                          | <a href="#">GCF_000816785.1-CPEL_RS08030</a>     | WP_044599<br>392.1 |                                  |
| <i>Campylobacter_D</i><br><i>sp000816245</i>    | GCF_000816<br>245.1 | <i>Campylobacter</i><br><i>sp.</i><br><i>RM16704</i>                                     | <a href="#">GCF_000816245.1-CAQ16704_RS07750</a> | WP_039667<br>627.1 | F3 system, <b>28H</b> , 40H, 44H |
|                                                 |                     |                                                                                          | <a href="#">GCF_000816245.1-CAQ16704_RS06675</a> | WP_039667<br>452.1 |                                  |
|                                                 |                     |                                                                                          | <a href="#">GCF_000816245.1-CAQ16704_RS05595</a> | WP_039667<br>264.1 |                                  |
|                                                 |                     |                                                                                          | <a href="#">GCF_000816245.1-CAQ16704_RS02125</a> | WP_052244<br>972.1 |                                  |
|                                                 |                     |                                                                                          | <a href="#">GCF_000816245.1-CAQ16704_RS07495</a> | WP_039667<br>590.1 |                                  |
| <i>Campylobacter_D</i><br><i>subantarcticus</i> | GCF_000816<br>305.1 | <i>Campylobacter</i><br><i>subantarcticus</i><br><i>LMG</i><br><i>24377</i>              | <a href="#">GCF_000816305.1-CSUB8523_RS09320</a> | WP_043020<br>302.1 | F3 system, <b>28H</b> , 40H      |
|                                                 |                     |                                                                                          | <a href="#">GCF_000816305.1-CSUB8523_RS09315</a> | WP_043020<br>301.1 |                                  |
|                                                 |                     |                                                                                          | <a href="#">GCF_000816305.1-CSUB8523_RS08420</a> | WP_043020<br>208.1 |                                  |
|                                                 |                     |                                                                                          | <a href="#">GCF_000816305.1-CSUB8523_RS08075</a> | WP_043020<br>166.1 |                                  |
|                                                 |                     |                                                                                          | <a href="#">GCF_000816305.1-CSUB8523_RS07005</a> | WP_043020<br>033.1 |                                  |
|                                                 |                     |                                                                                          | <a href="#">GCF_000816305.1-CSUB8523_RS00730</a> | WP_043019<br>309.1 |                                  |
| <i>Campylobacter_D</i><br><i>ornithocola</i>    | GCF_001705<br>345.1 | <i>Campylobacter</i><br><i>ornithocola</i><br><i>WBE38</i>                               | <a href="#">GCF_001705345.1-A7X81_RS05805</a>    | WP_066008<br>273.1 | F3 system, <b>28H</b> , 40H, 44H |
|                                                 |                     |                                                                                          | <a href="#">GCF_001705345.1-A7X81_RS02290</a>    | WP_066007<br>058.1 |                                  |
|                                                 |                     |                                                                                          | <a href="#">GCF_001705345.1-A7X81_RS00225</a>    | WP_066006<br>399.1 |                                  |
| <i>Campylobacter_D</i><br><i>lari</i>           | GCF_900111<br>465.1 | <i>Campylobacter</i><br><i>lari</i><br><i>subsp. Lari</i><br><i>ATCC</i><br><i>35221</i> | <a href="#">GCF_900111465.1-BMY58_RS03220</a>    | WP_081352<br>015.1 | F3 system, <b>28H</b> , 40H, 44H |
|                                                 |                     |                                                                                          | <a href="#">GCF_900111465.1-BMY58_RS06285</a>    | WP_012662<br>186.1 |                                  |

|                     |                                           |                                       |                                                                                      |                                                                                             |                                                    |                                  |                                  |
|---------------------|-------------------------------------------|---------------------------------------|--------------------------------------------------------------------------------------|---------------------------------------------------------------------------------------------|----------------------------------------------------|----------------------------------|----------------------------------|
|                     | <i>Campylobacter</i><br><i>D lari_B</i>   | GCF_000816<br>225.1                   | <i>Campylobacter</i><br><i>lari</i><br><i>subsp.</i><br><i>concheus</i><br>LMG 11760 | <a href="#">GCF_000816225.1-<br/>CONCH_RS07460</a>                                          | WP_039668<br>968.1                                 | F3 system, <b>28H</b> , 40H, 44H |                                  |
|                     |                                           |                                       |                                                                                      | <a href="#">GCF_000816225.1-<br/>CONCH_RS06405</a>                                          | WP_039668<br>807.1                                 |                                  |                                  |
|                     |                                           |                                       |                                                                                      | <a href="#">GCF_000816225.1-<br/>CONCH_RS00695</a>                                          | WP_039667<br>881.1                                 |                                  |                                  |
|                     |                                           |                                       |                                                                                      | <a href="#">GCF_000816225.1-<br/>CONCH_RS05400</a>                                          | WP_039668<br>641.1                                 |                                  |                                  |
|                     |                                           |                                       |                                                                                      | <a href="#">GCF_000816225.1-<br/>CONCH_RS02065</a>                                          | WP_039668<br>097.1                                 |                                  |                                  |
|                     |                                           |                                       |                                                                                      | <a href="#">GCF_000816225.1-<br/>CONCH_RS07215</a>                                          | WP_052239<br>476.1                                 |                                  |                                  |
|                     | <i>Campylobacter</i><br><i>D lari_C</i>   | GCF_001017<br>575.1                   | <i>Campylobacter</i><br><i>lari</i>                                                  | <a href="#">GCF_001017575.1-<br/>CD56_RS06815</a>                                           | WP_047208<br>605.1                                 | F3 system, <b>28H</b> , 40H, 44H |                                  |
|                     |                                           |                                       |                                                                                      | <a href="#">GCF_001017575.1-<br/>CD56_RS05810</a>                                           | WP_047208<br>471.1                                 |                                  |                                  |
|                     |                                           |                                       |                                                                                      | <a href="#">GCF_001017575.1-<br/>CD56_RS07085</a>                                           | WP_047208<br>641.1                                 |                                  |                                  |
|                     |                                           |                                       |                                                                                      | <a href="#">GCF_001017575.1-<br/>CD56_RS07865</a>                                           | WP_047208<br>712.1                                 |                                  |                                  |
|                     |                                           |                                       |                                                                                      | <a href="#">GCF_001017575.1-<br/>CD56_RS07860</a>                                           | WP_047208<br>711.1                                 |                                  |                                  |
|                     |                                           |                                       |                                                                                      | <a href="#">GCF_001017575.1-<br/>CD56_RS02030</a>                                           | WP_047208<br>044.1                                 |                                  |                                  |
|                     |                                           |                                       |                                                                                      | <a href="#">GCF_001017575.1-<br/>CD56_RS08150</a>                                           | WP_080956<br>350.1                                 |                                  |                                  |
|                     |                                           |                                       |                                                                                      | <a href="#">GCF_001017575.1-<br/>CD56_RS07615</a>                                           | WP_080956<br>346.1                                 |                                  |                                  |
|                     | <i>Campylobacter</i><br><i>D jejuni_C</i> | GCF_002179<br>635.1                   | <i>Campylobacter</i><br><i>jejuni S4</i>                                             | <a href="#">GCF_002179635.1-<br/>CAS13_RS02695</a>                                          | WP_087699<br>709.1                                 | F3 system, <b>28H</b> , 40H, 44H |                                  |
|                     |                                           |                                       |                                                                                      | <a href="#">GCF_002179635.1-<br/>CAS13_RS06905</a>                                          | WP_087700<br>724.1                                 |                                  |                                  |
|                     |                                           |                                       |                                                                                      | <a href="#">GCF_002179635.1-<br/>CAS13_RS05225</a>                                          | WP_087700<br>460.1                                 |                                  |                                  |
| f_Helicobacteraceae |                                           |                                       |                                                                                      |                                                                                             |                                                    |                                  |                                  |
|                     | Helicobacter                              | <i>Helicobacter</i><br><i>pylori</i>  | GCF_900478<br>295.1                                                                  | <i>Helicobacter</i><br><i>pylori</i><br>NCTC<br>11637 =<br>CCUG<br>17874 =<br>ATCC<br>43504 | <a href="#">GCF_900478295.1-<br/>DQL14_RS01445</a> | WP_108169<br>589.1               | F3 system, <b>28H</b> , 40H      |
|                     | Helicobacter<br>A                         | <i>Helicobacter</i><br><i>A bilis</i> | GCF_000686<br>565.1                                                                  | <i>Helicobacter</i><br><i>bilis</i> ATCC<br>51630                                           | <a href="#">GCF_000686565.1-<br/>T368_RS13380</a>  | WP_004087<br>959.1               | F3 system, <b>28H</b> , 40H, 44H |

|                 |                                  |                     |                                                    |                                                    |                    |                                               |
|-----------------|----------------------------------|---------------------|----------------------------------------------------|----------------------------------------------------|--------------------|-----------------------------------------------|
|                 |                                  |                     |                                                    | <a href="#">GCF_000686565.1-T368_RS0105195</a>     | WP_027338<br>340.1 |                                               |
|                 |                                  |                     |                                                    | <a href="#">GCF_000686565.1-T368_RS0103980</a>     | WP_027338<br>309.1 |                                               |
|                 |                                  |                     |                                                    | <a href="#">GCF_000686565.1-T368_RS0112100</a>     | WP_027338<br>528.1 |                                               |
|                 |                                  |                     |                                                    | <a href="#">GCF_000686565.1-T368_RS0111695</a>     | WP_004086<br>671.1 |                                               |
|                 |                                  |                     |                                                    | <a href="#">GCF_000686565.1-T368_RS0101325</a>     | WP_004088<br>793.1 |                                               |
|                 |                                  |                     |                                                    | <a href="#">GCF_000686565.1-T368_RS0104865</a>     | WP_004087<br>728.1 |                                               |
| Helicobacter_ B | <i>Helicobacter_ B canis</i>     | GCF_000507<br>865.1 | <i>Helicobacter_ r canis</i><br>NCTC<br>12740      | <a href="#">GCF_000507865.1-HMPREF2087_RS09205</a> | WP_034577<br>829.1 | F3 system, <b>28H</b> , 40H, 44H              |
|                 |                                  |                     |                                                    | <a href="#">GCF_000507865.1-HMPREF2087_RS07780</a> | WP_023930<br>583.1 |                                               |
|                 |                                  |                     |                                                    | <a href="#">GCF_000507865.1-HMPREF2087_RS04115</a> | WP_023929<br>761.1 |                                               |
|                 |                                  |                     |                                                    | <a href="#">GCF_000507865.1-HMPREF2087_RS09050</a> | WP_023930<br>866.1 |                                               |
|                 |                                  |                     |                                                    | <a href="#">GCF_000507865.1-HMPREF2087_RS05180</a> | WP_023929<br>979.1 |                                               |
| Helicobacter_ C | <i>Helicobacter_ C hepaticus</i> | GCF_000007<br>905.1 | <i>Helicobacter_ r hepaticus</i><br>ATCC<br>51449  | <a href="#">GCF_000007905.1-HH_RS05325</a>         | WP_011115<br>928.1 | F3 system, <b>28H</b> , 40H, 44H              |
|                 |                                  |                     |                                                    | <a href="#">GCF_000007905.1-HH_RS04770</a>         | WP_011115<br>811.1 |                                               |
|                 |                                  |                     |                                                    | <a href="#">GCF_000007905.1-HH_RS06465</a>         | WP_011116<br>177.1 |                                               |
|                 |                                  |                     |                                                    | <a href="#">GCF_000007905.1-HH_RS03595</a>         | WP_011115<br>567.1 |                                               |
| Helicobacter_ D | <i>Helicobacter_ D rodentium</i> | GCF_000687<br>535.1 | <i>Helicobacter_ r rodentium</i><br>ATCC<br>700285 | <a href="#">GCF_000687535.1-BS85_RS10280</a>       | WP_051604<br>694.1 | F3 system, <b>28H</b> , 40H, 44H              |
|                 |                                  |                     |                                                    | <a href="#">GCF_000687535.1-BS85_RS0106525</a>     | WP_026944<br>092.1 |                                               |
| Helicobacter_ E | <i>Helicobacter_ E felis</i>     | GCF_000200<br>595.1 | <i>Helicobacter_ r felis</i> ATCC<br>49179         | <a href="#">GCF_000200595.1-HFELIS_RS04385</a>     | WP_013469<br>327.1 | F3 system, 24H, <b>28H</b> , <b>40H</b> , 44H |
|                 |                                  |                     |                                                    | <a href="#">GCF_000200595.1-HFELIS_RS07975</a>     | WP_013470<br>049.1 |                                               |
|                 |                                  |                     |                                                    | <a href="#">GCF_000200595.1-HFELIS_RS02830</a>     | WP_081458<br>364.1 | 40H                                           |
|                 |                                  |                     |                                                    | <a href="#">GCF_000200595.1-HFELIS_RS03120</a>     | WP_013469<br>084.1 | 40H                                           |
|                 |                                  |                     |                                                    | <a href="#">GCF_000200595.1-HFELIS_RS01885</a>     | WP_013468<br>845.1 | 40H                                           |

|                       |                                             |                     |                                                                  |                                                    |                    |                                                            |
|-----------------------|---------------------------------------------|---------------------|------------------------------------------------------------------|----------------------------------------------------|--------------------|------------------------------------------------------------|
| Helicobacter_<br>F    | <i>Helicobacter_<br/>F<br/>himalayensis</i> | GCF_001602<br>095.1 | <i>Helicobacte<br/>r<br/>himalayensi<br/>s</i>                   | <a href="#">GCF_001602095.1-<br/>A3217_RS04305</a> | WP_082807<br>964.1 | F3 system, <b>28H</b> , 40H, 44H                           |
|                       |                                             |                     |                                                                  | <a href="#">GCF_001602095.1-<br/>A3217_RS01860</a> | WP_066387<br>242.1 |                                                            |
|                       |                                             |                     |                                                                  | <a href="#">GCF_001602095.1-<br/>A3217_RS06775</a> | WP_066389<br>087.1 |                                                            |
|                       |                                             |                     |                                                                  | <a href="#">GCF_001602095.1-<br/>A3217_RS00950</a> | WP_066386<br>874.1 |                                                            |
|                       |                                             |                     |                                                                  | <a href="#">GCF_001602095.1-<br/>A3217_RS05205</a> | WP_066388<br>688.1 |                                                            |
| Helicobacter_<br>G    | <i>Helicobacter_<br/>G<br/>cholecystus</i>  | GCF_900198<br>475.1 | <i>Helicobacte<br/>r<br/>cholecystus</i>                         | <a href="#">GCF_900198475.1-<br/>C6H20_RS03470</a> | WP_104724<br>582.1 | F3 system, 24H, <b>28H</b>                                 |
| Helicobacter_<br>H    | <i>Helicobacter_<br/>H<br/>sp900199585</i>  | GCF_900199<br>585.1 | <i>Helicobacte<br/>r<br/>sp. 'house<br/>sparrow 1'</i>           | <a href="#">GCF_900199585.1-<br/>C6H31_RS00220</a> | WP_104696<br>804.1 | F3 system, 24H, <b>28H</b> , 44H                           |
| Helicobacter_<br>I    | <i>Helicobacter_<br/>I<br/>sp002272925</i>  | GCF_002272<br>925.1 | <i>Helicobacte<br/>r<br/>sp.<br/>13S00401-1</i>                  |                                                    |                    | F3 system, 24H, 28H, 44H                                   |
| Helicobacter_<br>J    | <i>Helicobacter_<br/>J<br/>sp002272795</i>  | GCF_002272<br>795.1 | <i>Helicobacte<br/>r<br/>sp.<br/>13S00482-2</i>                  |                                                    |                    | F3 system, 24H, 40H, no 28H                                |
| Wolinella             | <i>Wolinella<br/>succinogenes</i>           | GCF_000196<br>135.1 | <i>Wolinella<br/>succinogene<br/>s<br/>DSM 1740</i>              | <a href="#">GCF_000196135.1-<br/>WS_RS06375</a>    | WP_049770<br>664.1 | F3 system, <b>28H</b> , 36H, <b>40H</b> , 44H              |
|                       |                                             |                     |                                                                  | <a href="#">GCF_000196135.1-<br/>WS_RS04140</a>    | WP_011138<br>770.1 |                                                            |
|                       |                                             |                     |                                                                  | <a href="#">GCF_000196135.1-<br/>WS_RS06705</a>    | WP_011139<br>256.1 | 40H                                                        |
| f_Hydrogenimonadaceae |                                             |                     |                                                                  |                                                    |                    |                                                            |
| Hydrogenimo<br>nas    | <i>Hydrogenimo<br/>nas<br/>thermophila</i>  | GCF_900115<br>615.1 | <i>Hydrogenim<br/>onas<br/>thermophila</i>                       | <a href="#">GCF_900115615.1-<br/>BM227_RS06280</a> | WP_092912<br>228.1 | F3, F7, and F8 systems, 28H, 34H,<br>36H, <b>40H</b> , 44H |
| f_Nitratiruptoraceae  |                                             |                     |                                                                  |                                                    |                    |                                                            |
| Nitratiruptor         | <i>Nitratiruptor<br/>tergarcus</i>          | GCF_900176<br>045.1 | <i>Nitratirupto<br/>r<br/>tergarcus<br/>DSM 16512</i>            |                                                    |                    | F14, 40H, 44H                                              |
| f_Sulfurimonadaceae   |                                             |                     |                                                                  |                                                    |                    |                                                            |
| Sulfuricurvum         | <i>Sulfuricurvum<br/>kuijense</i>           | GCF_000183<br>725.1 | <i>Sulfuricurvu<br/>m<br/>kuijense<br/>DSM 16994</i>             |                                                    |                    | F3, F7, and F8 systems, 28H, 34H,<br>36H, <b>40H</b> , 44H |
| Sulfurimonas          | <i>Sulfurimonas<br/>autotrophica</i>        | GCF_000147<br>355.1 | <i>Sulfurimona<br/>s<br/>autotrophic<br/>a<br/>DSM<br/>16294</i> | <a href="#">GCF_000147355.1-<br/>SAUT_RS06215</a>  | WP_013327<br>024.1 | F3 and F8 systems, 34H, <b>40H</b>                         |



|                       |                    |                                        |                 |                                                  |                                                |                |                                                            |
|-----------------------|--------------------|----------------------------------------|-----------------|--------------------------------------------------|------------------------------------------------|----------------|------------------------------------------------------------|
| f_Sulfurospirillaceae |                    |                                        |                 |                                                  |                                                |                |                                                            |
|                       | Sulfurospirillum   | <i>Sulfurospirillum deleyianum</i>     | GCF_000024885.1 | <i>Sulfurospirillum deleyianum</i><br>DSM 6946   | <a href="#">GCF_000024885.1-SDEL_RS09760</a>   | WP_012857693.1 | F3 and F7 systems, 36H, <b>40H</b> , 44H                   |
|                       |                    |                                        |                 |                                                  | <a href="#">GCF_000024885.1-SDEL_RS06120</a>   | WP_012856985.1 |                                                            |
|                       |                    |                                        |                 |                                                  | <a href="#">GCF_000024885.1-SDEL_RS04195</a>   | WP_012856614.1 |                                                            |
|                       |                    |                                        |                 |                                                  | <a href="#">GCF_000024885.1-SDEL_RS09765</a>   | WP_012857694.1 |                                                            |
|                       |                    |                                        |                 |                                                  | <a href="#">GCF_000024885.1-SDEL_RS05480</a>   | WP_012856856.1 |                                                            |
|                       | Sulfurospirillum_A | <i>Sulfurospirillum_A arcachonense</i> | GCF_000597725.1 | <i>Sulfurospirillum arcachonense</i><br>DSM 9755 | <a href="#">GCF_000597725.1-K354_RS0113080</a> | WP_051505455.1 | F3 and F7 systems, 24H, 28H, <b>36H</b> , <b>40H</b> , 44H |
|                       |                    |                                        |                 |                                                  | <a href="#">GCF_000597725.1-K354_RS0110060</a> | WP_024955370.1 | 40H                                                        |
|                       |                    |                                        |                 |                                                  | <a href="#">GCF_000597725.1-K354_RS0111745</a> | WP_024955694.1 | 36H                                                        |
|                       |                    |                                        |                 |                                                  | <a href="#">GCF_000597725.1-K354_RS14850</a>   | WP_024955923.1 | 40H                                                        |
|                       |                    |                                        |                 |                                                  | <a href="#">GCF_000597725.1-K354_RS14235</a>   | WP_024955498.1 | 40H                                                        |
| f_Sulfurovaceae       |                    |                                        |                 |                                                  |                                                |                |                                                            |
|                       | Nitratifractor     | <i>Nitratifractor salsuginis</i>       | GCF_000186245.1 | <i>Nitratifractor salsuginis</i><br>DSM 16511    |                                                |                | no chemotaxis                                              |
|                       | Sulfurovum         | <i>Sulfurovum lithotrophicum</i>       | GCF_000987835.1 | <i>Sulfurovum lithotrophicum</i>                 |                                                |                | no chemotaxis                                              |
| o_Nautiliales         |                    |                                        |                 |                                                  |                                                |                |                                                            |
| f_Nautilliaceae       |                    |                                        |                 |                                                  |                                                |                |                                                            |
|                       | Caminibacter       | <i>Caminibacter mediatlanticus</i>     | GCF_000170735.1 | <i>Caminibacter mediatlanticus</i><br>TB-2       |                                                |                | F3 system, 28H, 40H, 44H                                   |
|                       | Lebetimonas        | <i>Lebetimonas natsushimae</i>         | GCF_002335445.1 | <i>Lebetimonas natsushimae</i>                   |                                                |                | F3 system, 40H, 44H                                        |
|                       | Nautilia           | <i>Nautilia profundicola</i>           | GCF_000021725.1 | <i>Nautilia profundicola</i><br>AmH              |                                                |                | F3 system, 28H, 40H, 44H                                   |
| c_Desulfurelli        |                    |                                        |                 |                                                  |                                                |                |                                                            |
| a                     |                    |                                        |                 |                                                  |                                                |                |                                                            |
| o_Desulfurellales     |                    |                                        |                 |                                                  |                                                |                |                                                            |
| f_Desulfurellaceae    |                    |                                        |                 |                                                  |                                                |                |                                                            |

|              |              |                                 |                     |                                     |                          |
|--------------|--------------|---------------------------------|---------------------|-------------------------------------|--------------------------|
|              | Desulfurella | <i>Desulfurella acetivorans</i> | GCF_000517<br>565.1 | <i>Desulfurella acetivorans A63</i> | F1 system, 40H, 44H      |
|              | Desulfurella | <i>Desulfurella amilsii</i>     | GCF_002119<br>425.1 | <i>Desulfurella amilsii</i>         | F1 system, 40H, 44H      |
| f_Hippeaceae |              |                                 |                     |                                     |                          |
|              | Hippea       | <i>Hippea maritima</i>          | GCF_000194<br>135.1 | <i>Hippea maritima DSM 10411</i>    | F3 system, 24H, 40H, 44H |
|              | Hippea_A     | <i>Hippea jasoniae</i>          | GCF_000744<br>435.1 | <i>Hippea_A jasoniae</i>            | F3 system, 40H, 44H      |

**Table S2.** The presence of *tlp2*, *tlp3* and *tlp4* genes in *Campylobacter\_D* species with complete and draft genomes.

| GTDB Species                  | Assembly ID         | Strain                          | Tlp2 | Tlp3 paralog 1<br>YNxxxRxW<br>Y x Y x D | Tlp3/CcmL          | Tlp3 paralog 2 | Tlp4 |
|-------------------------------|---------------------|---------------------------------|------|-----------------------------------------|--------------------|----------------|------|
| <i>Campylobacter_D jejuni</i> | GCF_00150<br>7125.1 | Campylobacter jejuni CJ677CC024 |      |                                         |                    |                |      |
|                               | GCF_00150<br>6885.1 | Campylobacter jejuni CJ677CC040 |      |                                         |                    |                |      |
|                               | GCF_00150<br>6205.1 | Campylobacter jejuni CJ677CC002 |      |                                         |                    |                |      |
|                               | GCF_00150<br>6345.1 | Campylobacter jejuni CJ677CC036 |      |                                         |                    |                |      |
|                               | GCF_00150<br>6465.1 | Campylobacter jejuni CJ677CC530 |      |                                         |                    |                |      |
|                               | GCF_00150<br>6665.1 | Campylobacter jejuni CJ677CC528 |      |                                         |                    |                |      |
|                               | GCF_00150<br>7145.1 | Campylobacter jejuni CJ677CC064 |      |                                         |                    |                |      |
|                               | GCF_00150<br>7065.1 | Campylobacter jejuni CJ677CC094 |      |                                         | WP_05911<br>9483.1 |                |      |
|                               | GCF_00150<br>6485.1 | Campylobacter jejuni CJ677CC532 |      |                                         |                    |                |      |
|                               | GCF_00150<br>6705.1 | Campylobacter jejuni CJ677CC520 |      |                                         |                    |                |      |

GCF\_00150  
7045.1 Campylobacter jejuni CJ677CC522  
GCF\_00150  
6225.1 Campylobacter jejuni CJ677CC534  
GCF\_00150  
6445.1 Campylobacter jejuni CJ677CC092  
GCF\_00150  
6685.1 Campylobacter jejuni CJ677CC538  
GCF\_00150  
6385.1 Campylobacter jejuni CJ677CC016  
GCF\_00150  
6425.1 Campylobacter jejuni CJ677CC535  
GCF\_00150  
6505.1 Campylobacter jejuni CJ677CC529  
GCF\_00150  
6525.1 Campylobacter jejuni CJ677CC531  
GCF\_00150  
6565.1 Campylobacter jejuni CJ677CC059  
GCF\_00150  
6625.1 Campylobacter jejuni CJ677CC537  
GCF\_00150  
6745.1 Campylobacter jejuni CJ677CC039  
GCF\_00150  
6825.1 Campylobacter jejuni CJ677CC078  
GCF\_00150  
6905.1 Campylobacter jejuni CJ677CC061  
GCF\_00150  
6965.1 Campylobacter jejuni CJ677CC047  
GCF\_00150  
6985.1 Campylobacter jejuni CJ677CC058  
GCF\_00150  
7085.1 Campylobacter jejuni CJ677CC008  
GCF\_00150  
6185.1 Campylobacter jejuni CJ677CC519  
GCF\_00150  
6545.1 Campylobacter jejuni CJ677CC062  
GCF\_00150  
6805.1 Campylobacter jejuni CJ677CC527  
GCF\_00150  
7005.1 Campylobacter jejuni CJ677CC013

WP\_05911  
6327.1  
WP\_07975  
6629.1

WP\_07975  
6887.1

GCF\_00150  
7025.1 Campylobacter jejuni CJ677CC100  
GCF\_00150  
7185.1 Campylobacter jejuni CJ677CC026  
GCF\_00150  
6305.1 Campylobacter jejuni CJ677CC526  
GCF\_00150  
6365.1 Campylobacter jejuni CJ677CC524  
GCF\_00150  
7165.1 Campylobacter jejuni CJ677CC525  
GCF\_00150  
6245.1 Campylobacter jejuni CJ677CC536  
GCF\_00150  
6285.1 Campylobacter jejuni CJ677CC521  
GCF\_00150  
6845.1 Campylobacter jejuni CJ677CC523  
GCF\_00150  
6725.1 Campylobacter jejuni CJ677CC014  
GCF\_00150  
7225.1 Campylobacter jejuni CJ677CC086  
GCF\_00150  
6945.1 Campylobacter jejuni CJ677CC533  
GCF\_00150  
7245.1 Campylobacter jejuni CJ677CC095  
GCF\_00150  
7265.1 Campylobacter jejuni CJ677CC012  
GCF\_00150  
6585.1 Campylobacter jejuni CJ677CC032  
GCF\_00150  
7105.1 Campylobacter jejuni CJ677CC541  
GCF\_00150  
6265.1 Campylobacter jejuni CJ677CC073  
GCF\_00150  
6405.1 Campylobacter jejuni CJ677CC041  
GCF\_00150  
6605.1 Campylobacter jejuni CJ677CC033  
GCF\_00150  
6645.1 Campylobacter jejuni CJ677CC542  
GCF\_00150  
6765.1 Campylobacter jejuni CJ677CC085

WP\_07975  
6629.1

WP\_05911  
9230.1

|                     |                                                    |                    |                    |                |
|---------------------|----------------------------------------------------|--------------------|--------------------|----------------|
| GCF_00150<br>6785.1 | Campylobacter jejuni CJ677CC052                    |                    |                    |                |
| GCF_00150<br>6865.1 | Campylobacter jejuni CJ677CC540                    |                    |                    |                |
| GCF_00150<br>6925.1 | Campylobacter jejuni CJ677CC539                    |                    |                    |                |
| GCF_00150<br>7205.1 | Campylobacter jejuni CJ677CC034                    |                    |                    |                |
| GCF_00336<br>8245.1 | Campylobacter jejuni CJ066CC508                    |                    |                    |                |
| GCF_00093<br>4305.1 | Campylobacter jejuni subsp. Jejuni 35925           |                    |                    | WP_044305740.1 |
| GCF_00202<br>4325.1 | Campylobacter jejuni NCTC12662                     |                    | WP_07900<br>5337.1 | WP_044305740.1 |
| GCF_00202<br>8305.1 | Campylobacter jejuni subsp. Jejuni ATCC<br>35925   | WP_07939<br>9331.1 | WP_07900<br>5337.1 | WP_044305740.1 |
| GCF_00306<br>0765.1 | Campylobacter jejuni NCTC 12661                    |                    | WP_07900<br>5337.1 | WP_044305740.1 |
| GCF_00195<br>1255.1 | Campylobacter jejuni HF5-5-1                       | WP_03840<br>2013.1 | WP_07588<br>8393.1 | WP_075888364.1 |
| GCF_00195<br>1275.1 | Campylobacter jejuni HF5-7-1                       | WP_03840<br>2013.1 | WP_07588<br>8393.1 | WP_075888364.1 |
| GCF_00223<br>4455.1 | Campylobacter jejuni RM1246-ERRC                   | WP_09395<br>8665.1 | WP_07946<br>7350.1 | WP_087694997.1 |
| GCF_00049<br>3495.1 | Campylobacter jejuni 4031                          |                    | WP_07927<br>9415.1 |                |
| GCF_00336<br>8065.1 | Campylobacter jejuni CJ515CC45                     |                    |                    |                |
| GCF_00336<br>8125.1 | Campylobacter jejuni CJ513CC45                     |                    |                    |                |
| GCF_00336<br>8085.1 | Campylobacter jejuni CJ031CC45                     |                    |                    |                |
| GCF_00001<br>7905.1 | Campylobacter jejuni subsp. jejuni 81116           | WP_01200<br>6626.1 | WP_07925<br>4164.1 | WP_012006635.1 |
| GCF_00220<br>9065.1 | Campylobacter jejuni subsp. Jejuni<br>FDAARGOS_266 | WP_01200<br>6626.1 | WP_07925<br>4164.1 | WP_088592094.1 |
| GCF_00336<br>8045.1 | Campylobacter jejuni CJ067CC45                     |                    |                    |                |
| GCF_00073<br>7085.1 | Campylobacter jejuni subsp. Jejuni<br>MTVDSCj20    | WP_03840<br>2013.1 | WP_07588<br>8393.1 | WP_014516918.1 |

|                     |                                                    |                    |                    |                    |
|---------------------|----------------------------------------------------|--------------------|--------------------|--------------------|
| GCF_00014<br>8705.1 | Campylobacter jejuni subsp. jejuni M1              |                    | WP_07588<br>8393.1 | WP_014516918.1     |
| GCF_00141<br>2295.1 | Campylobacter jejuni CJM1cam                       |                    | WP_07588<br>8393.1 | WP_014516918.1     |
| GCF_00336<br>8105.1 | Campylobacter jejuni CJ017CCUA                     |                    |                    |                    |
| GCF_00145<br>7695.1 | Campylobacter jejuni NCTC11351                     | WP_05820<br>7847.1 | WP_07975<br>4350.1 |                    |
| GCF_00220<br>9005.1 | Campylobacter jejuni subsp. Jejuni<br>FDAARGOS_262 | WP_05820<br>7847.1 | WP_07975<br>4350.1 |                    |
| GCF_00129<br>9565.1 | Campylobacter jejuni subsp. Jejuni<br>RM3197       | WP_00285<br>4643.1 | WP_07925<br>4326.1 | WP_002854722.1     |
| GCF_00129<br>9595.1 | Campylobacter jejuni subsp. Jejuni<br>RM3196       | WP_00285<br>4643.1 | WP_07925<br>4326.1 | WP_002854722.1     |
| GCF_00001<br>5525.1 | Campylobacter jejuni subsp. jejuni 81-176          | WP_00988<br>1803.1 |                    | WP_009881974.1     |
| GCF_00222<br>4385.1 | Campylobacter jejuni 81-176_G1_B0                  | WP_00988<br>1803.1 |                    | WP_009881974.1     |
| GCF_00168<br>6905.1 | Campylobacter jejuni subsp. Jejuni<br>RM1285       |                    | WP_01089<br>1944.1 | WP_065453843.1     |
| GCF_00176<br>7215.1 | Campylobacter jejuni subsp. jejuni str.<br>RM3420  | WP_07036<br>3962.1 | WP_07946<br>1914.1 | WP_002851876.1     |
| GCF_00221<br>4785.1 | Campylobacter jejuni FORC_046                      | WP_05279<br>1709.1 |                    | WP_002851876.1     |
| GCF_00171<br>7625.1 | Campylobacter jejuni subsp. Jejuni 14980A          |                    | WP_07946<br>0008.1 | WP_07985<br>1618.1 |
| GCF_00336<br>8205.1 | Campylobacter jejuni CJ090CC1332                   |                    |                    |                    |
| GCF_00336<br>8225.1 | Campylobacter jejuni CJ018CCUA                     |                    | WP_11576<br>6720.1 |                    |
| GCF_00336<br>8185.1 | Campylobacter jejuni CJ071CC464                    |                    |                    |                    |
| GCF_00186<br>5435.1 | Campylobacter jejuni IF1100                        |                    |                    |                    |
| GCF_00083<br>5285.1 | Campylobacter jejuni subsp. Jejuni 00-1597         |                    | WP_07939<br>4622.1 | WP_07939<br>4630.1 |
| GCF_00186<br>5595.1 | Campylobacter jejuni subsp. jejuni M129            | WP_01451<br>7177.1 | WP_07946<br>0163.1 | WP_07986<br>5828.1 |
| GCF_00186<br>5395.1 | Campylobacter jejuni FJ3124                        |                    | WP_07946<br>0008.1 |                    |

|                     |                                                    |                    |                    |                    |                    |
|---------------------|----------------------------------------------------|--------------------|--------------------|--------------------|--------------------|
| GCF_00336<br>8145.1 | Campylobacter jejuni CJ088CC52                     |                    |                    |                    |                    |
| GCF_00017<br>1795.2 | Campylobacter jejuni CG8421                        |                    | WP_07934<br>3735.1 |                    |                    |
| GCF_00018<br>4205.1 | Campylobacter jejuni subsp. jejuni S3              | WP_01451<br>7177.1 | WP_07925<br>4342.1 | WP_07925<br>4358.1 | WP_014517176.1     |
| GCF_00001<br>1865.1 | Campylobacter jejuni RM1221                        | WP_01104<br>9652.1 |                    | WP_07925<br>4358.1 | WP_011049651.1     |
| GCF_00258<br>7225.1 | Campylobacter jejuni FDAARGOS_421                  | WP_01104<br>9652.1 |                    | WP_07925<br>4358.1 | WP_011049651.1     |
| GCF_00336<br>8165.1 | Campylobacter jejuni CJ074CC443                    |                    |                    | WP_11576<br>9683.1 |                    |
| GCF_00156<br>3565.1 | Campylobacter jejuni RM3194                        | WP_05281<br>6913.1 | WP_07946<br>0008.1 | WP_01089<br>1944.1 | WP_061099736.1     |
| GCF_00172<br>1965.1 | Campylobacter jejuni subsp. Jejuni<br>MTVDSCj13    |                    | WP_07985<br>4565.1 | WP_07985<br>4575.1 |                    |
| GCF_00172<br>1985.1 | Campylobacter jejuni subsp. Jejuni<br>MTVDSCj16    |                    | WP_07985<br>4703.1 | WP_07985<br>4727.1 |                    |
| GCF_00303<br>0185.1 | Campylobacter jejuni CFSAN054107                   |                    | WP_10713<br>1175.1 | WP_10713<br>1164.1 |                    |
| GCF_00186<br>5415.1 | Campylobacter jejuni TS1218                        |                    | WP_07131<br>1218.1 |                    |                    |
| GCF_00187<br>0085.1 | Campylobacter jejuni YQ2210                        |                    |                    |                    |                    |
| GCF_00187<br>0105.1 | Campylobacter jejuni ZP3204                        |                    |                    |                    |                    |
| GCF_00043<br>0385.1 | Campylobacter jejuni 32488                         |                    |                    | WP_07926<br>9902.1 | WP_07926<br>9906.1 |
| GCF_00240<br>7125.1 | Campylobacter jejuni CFSAN032806                   | WP_09677<br>7911.1 |                    | WP_09677<br>7910.1 | WP_009881974.1     |
| GCF_00077<br>2225.1 | Campylobacter jejuni subsp. jejuni F38011          | WP_00988<br>1803.1 |                    | WP_01089<br>1944.1 | WP_041160003.1     |
| GCF_00220<br>9045.1 | Campylobacter jejuni subsp. Jejuni<br>FDAARGOS_265 |                    | WP_07946<br>0163.1 | WP_08858<br>5164.1 |                    |
| GCF_00158<br>7015.1 | Campylobacter jejuni OD267                         |                    |                    | WP_06157<br>7918.1 |                    |
| GCF_00158<br>7035.1 | Campylobacter jejuni WP2202                        |                    |                    |                    | WP_061563569.1     |
| GCF_00030<br>2555.5 | Campylobacter jejuni subsp. jejuni PT14            |                    | WP_07976<br>8733.1 | WP_07976<br>8734.1 | WP_015016423.1     |

|                             |                                                                        |                            |                            |                       |
|-----------------------------|------------------------------------------------------------------------|----------------------------|----------------------------|-----------------------|
| GCF_00172<br>1945.1         | Campylobacter jejuni subsp. Jejuni<br>MTVDSCj07                        | WP_06935<br>8644.1         | WP_01089<br>1944.1         | WP_015016423.1        |
| GCF_00131<br>4285.1         | Campylobacter jejuni RM1285                                            |                            | WP_01089<br>1944.1         |                       |
| GCF_00306<br>0785.1         | Campylobacter jejuni NCTC 12664                                        |                            | WP_10861<br>4575.1         | WP_108614536.1        |
| GCF_00195<br>1235.1         | Campylobacter jejuni HF5-4A-4                                          | WP_07591<br>2927.1         | WP_07591<br>2974.1         | WP_075912928.1        |
| GCF_00258<br>7105.1         | Campylobacter jejuni FDAARGOS_422                                      | WP_00285<br>1724.1         | WP_01089<br>1944.1         | WP_002851876.1        |
| <b>GCF_00000<br/>9085.1</b> | <b>Campylobacter jejuni subsp. jejuni NCTC<br/>11168 = ATCC 700819</b> | <b>YP_002343<br/>604.1</b> | <b>YP_002344<br/>933.1</b> | <b>YP_002343704.1</b> |
| GCF_00030<br>4375.1         | Campylobacter jejuni subsp. jejuni NCTC<br>11168-BN148                 | WP_00988<br>1803.1         | WP_01089<br>1944.1         | WP_009881974.1        |
| GCF_00083<br>0775.1         | Campylobacter jejuni subsp. jejuni NCTC<br>11168-K12E5                 | WP_04133<br>7137.1         | WP_07939<br>4646.1         | WP_041337140.1        |
| GCF_00083<br>0805.1         | Campylobacter jejuni subsp. jejuni NCTC<br>11168-Kf1                   | WP_04133<br>7137.1         | WP_07939<br>4646.1         | WP_041337140.1        |
| GCF_00083<br>0825.1         | Campylobacter jejuni subsp. jejuni NCTC<br>11168-mcK12E5               | WP_00988<br>1803.1         | WP_01089<br>1944.1         | WP_009881974.1        |
| GCF_00083<br>0845.1         | Campylobacter jejuni subsp. jejuni NCTC<br>11168-mfK12E5               | WP_00988<br>1803.1         | WP_01089<br>1944.1         | WP_009881974.1        |
| GCF_00083<br>0865.1         | Campylobacter jejuni subsp. jejuni NCTC<br>11168-GSv                   | WP_00988<br>1803.1         | WP_01089<br>1944.1         | WP_009881974.1        |
| GCF_00220<br>9025.1         | Campylobacter jejuni subsp. Jejuni<br>FDAARGOS_263                     | WP_00988<br>1803.1         |                            | WP_009881974.1        |
| GCF_00222<br>4325.1         | Campylobacter jejuni 11168H/lacY                                       | WP_00988<br>1803.1         | WP_01089<br>1944.1         | WP_009881974.1        |
| GCF_00223<br>8375.1         | Campylobacter jejuni 11168H/araE                                       | WP_00988<br>1803.1         | WP_01089<br>1944.1         | WP_009881974.1        |
| GCF_90047<br>5265.1         | Campylobacter jejuni subsp. jejuni                                     | WP_00988<br>1803.1         | WP_01089<br>1944.1         | WP_009881974.1        |
| GCF_00306<br>0745.1         | Campylobacter jejuni NCTC 12660                                        |                            | WP_10859<br>2625.1         | WP_10859<br>2594.1    |
| GCF_00195<br>1295.1         | Campylobacter jejuni NS4-1-1                                           |                            | WP_07222<br>3305.1         | WP_07586<br>7322.1    |
| GCF_00195<br>1315.1         | Campylobacter jejuni NS4-5-1                                           |                            | WP_07222<br>3305.1         | WP_07586<br>7322.1    |
| GCF_00195<br>1335.1         | Campylobacter jejuni NS4-9-1                                           |                            | WP_07222<br>3305.1         | WP_07586<br>7322.1    |



|                                    |                     |                                                 |                    |                    |                    |                                   |
|------------------------------------|---------------------|-------------------------------------------------|--------------------|--------------------|--------------------|-----------------------------------|
|                                    | GCF_00002<br>5425.1 | Campylobacter jejuni subsp. jejuni IA3902       |                    | WP_01451<br>6860.1 | WP_07925<br>4169.1 |                                   |
|                                    | GCF_00083<br>5345.1 | Campylobacter jejuni subsp. Jejuni 01-1512      | WP_07939<br>4712.1 | WP_07939<br>4745.1 |                    | WP_009881974.1                    |
|                                    | GCF_00083<br>5365.1 | Campylobacter jejuni subsp. Jejuni 00-0949      | WP_07939<br>4712.1 | WP_07939<br>4721.1 |                    |                                   |
|                                    | GCF_00306<br>0725.1 | Campylobacter jejuni 12567                      |                    |                    |                    |                                   |
|                                    | GCF_00210<br>1355.1 | Campylobacter jejuni YH002                      |                    | WP_01451<br>6860.1 | WP_07925<br>4169.1 |                                   |
|                                    | GCF_00083<br>5305.1 | Campylobacter jejuni subsp. Jejuni 00-6200      |                    | WP_01451<br>6860.1 | WP_07939<br>4740.1 |                                   |
|                                    | GCF_00046<br>6075.2 | Campylobacter jejuni subsp. jejuni 00-2544      |                    | WP_07937<br>6548.1 | WP_07937<br>6546.1 |                                   |
|                                    | GCF_00046<br>6065.2 | Campylobacter jejuni subsp. jejuni 00-2538      |                    | WP_07937<br>6548.1 | WP_07937<br>6546.1 |                                   |
|                                    | GCF_00046<br>6105.2 | Campylobacter jejuni subsp. jejuni 00-2426      |                    | WP_07937<br>6548.1 | WP_07937<br>6546.1 |                                   |
|                                    | GCF_00046<br>8915.2 | Campylobacter jejuni subsp. jejuni 00-2425      |                    | WP_07937<br>6548.1 | WP_07937<br>6546.1 |                                   |
| <i>Campylobacter_D cuniculorum</i> | GCF_00210<br>4335.1 | Campylobacter cuniculorum DSM 23162 = LMG 24588 |                    |                    |                    |                                   |
|                                    | GCF_00062<br>1005.1 | Campylobacter cuniculorum DSM 23162 = LMG 24588 |                    |                    |                    |                                   |
| <i>Campylobacter_D helveticus</i>  | GCF_00208<br>0395.1 | Campylobacter helveticus                        | WP_08220<br>0713.1 |                    |                    | WP_082200691.1,<br>WP_082200520.1 |
|                                    | GCF_90017<br>6295.1 | Campylobacter helveticus                        |                    |                    |                    |                                   |
| <i>Campylobacter_D upsaliensis</i> | GCF_00062<br>0965.1 | Campylobacter upsaliensis DSM 5365              |                    |                    |                    |                                   |
|                                    | GCF_00016<br>7395.1 | Campylobacter upsaliensis RM3195                | WP_00427<br>5314.1 |                    |                    |                                   |
|                                    | GCF_00018<br>5345.1 | Campylobacter upsaliensis JV21                  |                    |                    |                    |                                   |
| <i>Campylobacter_D sp002738235</i> | GCF_00273<br>8235.1 | Campylobacter sp. 73/13                         |                    |                    |                    |                                   |

|                                  |                     |                                      |                    |                    |
|----------------------------------|---------------------|--------------------------------------|--------------------|--------------------|
| <i>Campylobacter_D hepaticus</i> | GCF_00273<br>8305.1 | Campylobacter sp. 251/13             |                    |                    |
|                                  | GCF_00168<br>7475.1 | Campylobacter hepaticus              |                    |                    |
| <i>Campylobacter_D coli</i>      | GCF_00025<br>4135.1 | Campylobacter coli LMG 9860          |                    |                    |
|                                  | GCF_00202<br>4185.1 | Campylobacter coli aerotolerant OR12 |                    | WP_09904<br>6908.1 |
|                                  | GCF_00046<br>5235.1 | Campylobacter coli CVM N29710        |                    | WP_02103<br>3641.1 |
|                                  | GCF_00049<br>4775.1 | Campylobacter coli 15-537360         | WP_02336<br>2248.1 | WP_02336<br>2235.1 |
|                                  | GCF_00058<br>3755.1 | Campylobacter coli RM1875            |                    |                    |
|                                  | GCF_00058<br>3795.1 | Campylobacter coli RM5611            | WP_02543<br>1530.1 | WP_02543<br>1485.1 |
|                                  | GCF_00095<br>4195.1 | Campylobacter coli FB1               | WP_04524<br>3712.1 | WP_04524<br>3711.1 |
|                                  | GCF_00141<br>7635.1 | Campylobacter coli HC2-48            |                    |                    |
|                                  | GCF_00148<br>3845.1 | Campylobacter coli OR12              |                    | WP_05891<br>4555.1 |
|                                  | GCF_00163<br>9125.1 | Campylobacter coli YH501             |                    | WP_06365<br>1861.1 |
|                                  | GCF_00171<br>7605.1 | Campylobacter coli 14983A            |                    | WP_05799<br>2610.1 |
|                                  | GCF_00186<br>5495.1 | Campylobacter coli BP3183            |                    | WP_07130<br>4885.1 |
|                                  | GCF_00186<br>5515.1 | Campylobacter coli WA333             |                    |                    |
|                                  | GCF_00186<br>5555.1 | Campylobacter coli BG2108            |                    |                    |
|                                  | GCF_00193<br>6355.1 | Campylobacter coli YH502             |                    | WP_07539<br>5263.1 |
|                                  | GCF_00240<br>7145.1 | Campylobacter coli CFSAN032805       |                    | WP_09678<br>8361.1 |
|                                  | GCF_00284<br>3985.1 | Campylobacter coli YH503             |                    | WP_10134<br>8801.1 |

|                               |                     |                                |                    |                    |                |
|-------------------------------|---------------------|--------------------------------|--------------------|--------------------|----------------|
|                               | GCF_00303<br>0205.1 | Campylobacter coli CFSAN054106 | WP_10712<br>8010.1 | WP_10712<br>8017.1 |                |
|                               | GCF_00141<br>7615.1 | Campylobacter coli CO2-160     | WP_06047<br>3514.1 |                    |                |
|                               | GCF_00141<br>7655.1 | Campylobacter coli CF2-75      |                    |                    |                |
| <i>Campylobacter_D coli_A</i> | GCF_00047<br>0055.1 | Campylobacter coli 76339       | WP_02097<br>3958.1 |                    |                |
|                               | GCF_00047<br>0055.1 | Campylobacter coli             | WP_02097<br>3958.1 |                    |                |
|                               | GCF_00148<br>8335.1 | Campylobacter coli             |                    |                    |                |
|                               | GCF_00201<br>9885.1 | Campylobacter coli VA7         |                    | WP_07839<br>7504.1 |                |
|                               | GCF_00149<br>5535.1 | Campylobacter coli             |                    |                    |                |
|                               | GCF_00149<br>8475.1 | Campylobacter coli             |                    | WP_07550<br>4589.1 |                |
|                               | GCF_00149<br>4895.1 | Campylobacter coli             |                    | WP_07548<br>2578.1 |                |
| <i>Campylobacter_D coli_B</i> | GCF_00149<br>2295.1 | Campylobacter coli             |                    | WP_05896<br>8202.1 |                |
|                               | GCF_00201<br>9985.1 | Campylobacter coli VA46        |                    | WP_07544<br>7212.1 |                |
|                               | GCF_00202<br>0085.1 | Campylobacter coli VA37        |                    |                    |                |
|                               | GCF_00201<br>9865.1 | Campylobacter coli VA6         |                    | WP_07841<br>6234.1 |                |
|                               | GCF_00202<br>0015.1 | Campylobacter coli VA8         |                    | WP_07544<br>7212.1 | WP_052774443.1 |
|                               | GCF_00149<br>1515.1 | Campylobacter coli             |                    | WP_07543<br>8466.1 |                |
|                               | GCF_00149<br>0995.1 | Campylobacter coli             |                    |                    |                |
|                               | GCF_00149<br>7615.1 | Campylobacter coli             |                    | WP_07545<br>7517.1 |                |

**Table S3:** Glycan structures recognized by (A) T1p2<sup>LBD</sup>, (B) T1p3<sup>LBD</sup> and (C) T1p4<sup>LBD</sup>. Blood group A antigens - A (typeX), Blood group B antigens -B (typeX), Blood group H antigens -H (typeX), Lewis<sup>a</sup> (Le<sup>a</sup>), Lewis<sup>b</sup> (Le<sup>b</sup>), Lewis<sup>c</sup> (Le<sup>c</sup>), Lewis<sup>x</sup> (Le<sup>x</sup>), Lewis<sup>y</sup> (Le<sup>y</sup>), Ganglioside asialo GM1(Asialo-GM1), Thomsen-Friedenreich (TF) antigens, and Thomsen nouvelle (Tn) antigens. GM1(Asialo-GM1), Thomsen-Friedenreich (TF) antigens, P antigens P<sub>1</sub>, P<sub>2</sub>, P<sup>k</sup>, and P and Thomsen nouvelle (Tn) antigens.

### (A) T1p2

| Glycan No | Structure                                                                        | Common name                   |
|-----------|----------------------------------------------------------------------------------|-------------------------------|
| 240       | (Glc $\alpha$ 1-4)3 $\beta$ -sp4                                                 | TRISACCHARIDES                |
| 390       | (Glc $\alpha$ 1-4)4 $\beta$ -sp4                                                 | TRISACCHARIDES                |
| 241       | (Glc $\alpha$ 1-6)3 $\beta$ -sp4                                                 | TRISACCHARIDES                |
| 492       | (Glc $\alpha$ 1-6)5 $\beta$ -sp4                                                 | PENTA-NONA<br>SACCHARIDES     |
| 502       | (Glc $\alpha$ 1-6)6 $\beta$ -sp4                                                 | PENTA-NONA<br>SACCHARIDES     |
| 165       | GlcA $\beta$ 1-3Gal $\beta$ -sp3                                                 | DISACCHARIDES                 |
| 164       | GlcA $\beta$ 1-3GlcNAc $\beta$ -sp3                                              | DISACCHARIDES                 |
| 166       | GlcA $\beta$ 1-6Gal $\beta$ -sp3                                                 | DISACCHARIDES                 |
| 392       | Fuca1-2(GalNAc $\alpha$ 1-3)Gal $\beta$ 1-3GalNAc $\alpha$ -sp3                  | A (type 3)                    |
| 366       | Fuca1-2(GalNAc $\alpha$ 1-3)Gal $\beta$ 1-3GlcNAc $\beta$ -sp3                   | A (type 1)                    |
| 368       | Fuca1-2(GalNAc $\alpha$ 1-3)Gal $\beta$ 1-4GlcNAc $\beta$ -sp3                   | A (type 2)                    |
| 363       | Fuca1-2(Gal $\alpha$ 1-3)Gal $\beta$ 1-3GalNAc $\beta$ -sp3                      | B (type 4)                    |
| 359       | Fuca1-2(Gal $\alpha$ 1-3)Gal $\beta$ 1-3GlcNAc $\beta$ -sp3                      | B (type 1)                    |
| 360       | Fuca1-2(Gal $\alpha$ 1-3)Gal $\beta$ 1-4GlcNAc $\beta$ -sp3                      | B (type 2)                    |
| 371       | Fuca1-2Gal $\beta$ 1-3(Fuca1-4)GlcNAc $\beta$ -sp3                               | Le <sup>b</sup>               |
| 480       | Fuca1-2Gal $\beta$ 1-3GlcNAc $\beta$ 1-3Gal $\beta$ 1-4GlcNAc $\beta$ -sp2       | H (type1) penta               |
| 19L       | Fuca1-2Gal $\beta$ 1-4(Fuca1-3)GlcNAc $\beta$ 1-3Gal                             | Le <sup>y</sup> pentaose      |
| 216       | Fuca1-2Gal $\beta$ 1-4GlcNAc $\beta$ -sp3                                        | H (type 2)                    |
| 219       | Fuca1-2Gal $\beta$ 1-4Glc $\beta$ -sp4                                           | H (type 6)                    |
| 71        | Fuca1-2Gal $\beta$ -sp3                                                          | H <sub>di</sub>               |
| 483       | Fuca1-3(Fuca1-2 (Gal $\alpha$ 1-3)Gal $\beta$ 1-4)GlcNAc $\beta$ -sp3            | Ble <sup>y</sup>              |
| 497       | Fuca1-3(Fuca1-2Gal $\beta$ 1-4)GlcNAc $\beta$ 1-3Gal $\beta$ 1-4Glc $\beta$ -sp4 | Le <sup>y</sup> -Lac          |
| 372       | Fuca1-3(Fuca1-2Gal $\beta$ 1-4)GlcNAc $\beta$ -sp3                               | Le <sup>y</sup>               |
| 364       | Fuca1-3(Gal $\alpha$ 1-3Gal $\beta$ 1-4)GlcNAc $\beta$ -sp3                      | $\alpha$ Gal-Le <sup>x</sup>  |
| 234       | Fuca1-3(Gal $\beta$ 1-4)GlcNAc $\beta$ -sp3                                      | Le <sup>x</sup>               |
| 429       | Fuca1-3(Neu5Ac $\alpha$ 2-3(6-O-Su)Gal $\beta$ 1-4)GlcNAc $\beta$ -sp3           | TETRASACCHARIDES              |
| 428       | Fuca1-3(Neu5Ac $\alpha$ 2-3Gal $\beta$ 1-4)6-O-Su-GlcNAc $\beta$ -sp3            | TETRASACCHARIDES              |
| 423       | Fuca1-3(Neu5Ac $\alpha$ 2-3Gal $\beta$ 1-4)GlcNAc $\beta$ -sp3                   | Sia-Le <sup>x</sup>           |
| 18E       | GalNAc $\alpha$ 1-3(Fuca1-2)Gal $\beta$ 1-4(Fuca1-3)Glc                          | Blood group A pentasaccharide |
| 9A        | Gal $\alpha$ 1-3(Fuca1-2)Gal $\beta$ 1-4(Fuca1-3)Glc                             | Blood Group B pentasaccharide |
| 233       | Gal $\beta$ 1-3(Fuca1-4)GlcNAc $\beta$ -sp3                                      | Le <sup>a</sup>               |

|     |                                                                                                                                                                                            |                             |
|-----|--------------------------------------------------------------------------------------------------------------------------------------------------------------------------------------------|-----------------------------|
| 8C  | Gal $\beta$ 1-3GlcNAc $\beta$ 1-3Gal $\beta$ 1-4(Fuca1-3)GlcNAc $\beta$ 1-3Gal $\beta$ 1-4Glc                                                                                              | Fucosylated glycans         |
| 19J | Gal $\beta$ 1-4(Fuca1-3)GlcNAc $\beta$ 1-3Gal                                                                                                                                              | Le <sup>x</sup> tetraose    |
| 8E  | Gal $\beta$ 1-4(Fuca1-3)GlcNAc $\beta$ 1-6(Fuca1-2Gal $\beta$ 1-3GlcNAc $\beta$ 1-3)Gal $\beta$ 1-4Glc                                                                                     | Fucosylated glycans         |
| 289 | Gal $\alpha$ 1-3(Neu5Ac $\alpha$ 2-6)GalNAc $\alpha$ -sp3                                                                                                                                  | 6-Sia-TF                    |
| 2A  | Gal $\alpha$ 1-3Gal $\beta$ 1-4Gal $\alpha$ 1-3Gal                                                                                                                                         | Terminal galactose          |
| 373 | Gal $\alpha$ 1-3Gal $\beta$ 1-4GlcNAc $\beta$ 1-3Gal $\beta$ -sp3                                                                                                                          | Galili 4                    |
| 220 | Gal $\alpha$ 1-3Gal $\beta$ 1-4Glc $\beta$ -sp2                                                                                                                                            | TRISACCHARIDES              |
| 375 | Gal $\alpha$ 1-4GlcNAc $\beta$ 1-3Gal $\beta$ 1-4GlcNAc $\beta$ -sp3                                                                                                                       | TETRASACCHARIDES            |
| 228 | Gal $\beta$ 1-2Gal $\alpha$ 1-4GlcNAc $\beta$ -sp4                                                                                                                                         | TRISACCHARIDES              |
| 145 | Gal $\beta$ 1-3(6-O-Su)GlcNAc $\beta$ -sp3                                                                                                                                                 | 6-O-Su-Le <sup>c</sup>      |
| 388 | Gal $\beta$ 1-3(Gal $\beta$ 1-4GlcNAc $\beta$ 1-6)GalNAc $\alpha$ -sp3                                                                                                                     | TETRASACCHARIDES            |
| 382 | Gal $\beta$ 1-3GalNAc $\beta$ 1-4Gal $\beta$ 1-4Glc $\beta$ -sp3                                                                                                                           | Asialo-GM1                  |
| 229 | Gal $\beta$ 1-3Gal $\beta$ 1-4GlcNAc $\beta$ -sp4                                                                                                                                          | TRISACCHARIDES              |
| 377 | Gal $\beta$ 1-3GlcNAc $\beta$ 1-3Gal $\beta$ 1-3GlcNAc $\beta$ -sp2                                                                                                                        | TETRASACCHARIDES            |
| 379 | Gal $\beta$ 1-3GlcNAc $\beta$ 1-3Gal $\beta$ 1-4GlcNAc $\beta$ -sp3                                                                                                                        | TETRASACCHARIDES            |
| 376 | Gal $\beta$ 1-3GlcNAc $\beta$ 1-3Gal $\beta$ 1-4Glc $\beta$ -sp4                                                                                                                           | TETRASACCHARIDES            |
| 381 | Gal $\beta$ 1-3GlcNAc $\beta$ 1-6Gal $\beta$ 1-4GlcNAc $\beta$ -sp2                                                                                                                        | TETRASACCHARIDES            |
| 18M | Gal $\beta$ 1-4Gal                                                                                                                                                                         | Terminal galactose          |
| 264 | Gal $\beta$ 1-4Gal $\beta$ 1-4GlcNAc-sp3                                                                                                                                                   | TRISACCHARIDES              |
| 94  | Gal $\beta$ 1-4Gal $\beta$ -sp4                                                                                                                                                            | TRISACCHARIDES              |
| 488 | Gal $\beta$ 1-4GlcNAc $\beta$ 1-3(Gal $\beta$ 1-4GlcNAc $\beta$ 1-6)GalNAc $\alpha$ -sp3                                                                                                   | LN2-3,6-Tn                  |
| 499 | Gal $\beta$ 1-4GlcNAc $\beta$ 1-3(Gal $\beta$ 1-4GlcNAc $\beta$ 1-6)Gal $\beta$ 1-4GlcNAc-sp2                                                                                              | PENTA-NONA<br>SACCHARIDES   |
| 489 | Gal $\beta$ 1-4GlcNAc $\beta$ 1-3(GlcNAc $\beta$ 1-6)Gal $\beta$ 1-4GlcNAc-sp2                                                                                                             | PENTA-NONA<br>SACCHARIDES   |
| 383 | Gal $\beta$ 1-4GlcNAc $\beta$ 1-3Gal $\beta$ 1-4Glc $\beta$ -sp2                                                                                                                           | TETRASACCHARIDES            |
| 97  | Gal $\beta$ 1-4GlcNAc $\beta$ -sp3                                                                                                                                                         | DISACCHARIDES               |
| 119 | Man $\alpha$ 1-2Man $\beta$ -sp4                                                                                                                                                           | DISACCHARIDES               |
| 495 | Man $\alpha$ 1-3(Man $\alpha$ 1-3(Man $\alpha$ 1-6)Man $\alpha$ 1-6)Man $\beta$ -sp4                                                                                                       | PENTA-NONA<br>SACCHARIDES   |
| 258 | Man $\alpha$ 1-3(Man $\alpha$ 1-6)Man $\beta$ -sp4                                                                                                                                         | TRISACCHARIDES              |
| 120 | Man $\alpha$ 1-3Man $\beta$ -sp4                                                                                                                                                           | DISACCHARIDES               |
| 121 | Man $\alpha$ 1-4Man $\beta$ -sp4                                                                                                                                                           | DISACCHARIDES               |
| 5F  | Man $\alpha$ 1-6Man                                                                                                                                                                        | Mannosyl containing glycans |
| 122 | Man $\alpha$ 1-6Man $\beta$ -sp4                                                                                                                                                           | DISACCHARIDES               |
| 123 | Man $\beta$ 1-4GlcNAc $\beta$ -sp4                                                                                                                                                         | DISACCHARIDES               |
| 19F | Neu5Ac $\alpha$ 2-6Gal $\beta$ 1-4GlcNAc $\beta$ 1-2Man $\alpha$ 1-3(Neu5Ac $\alpha$ 2-6Gal $\beta$ 1-4GlcNAc $\beta$ 1-2Man $\alpha$ 1-6)Man $\beta$ 1-4GlcNAc $\beta$ 1-4(Fuca1-6)GlcNAc | Complex type X-glycan       |

## (B) T1p3

| Glycan | Structure                                                         | Common name                                        |
|--------|-------------------------------------------------------------------|----------------------------------------------------|
| 12P    | $\Delta$ UA-GalNAc-4S,6S                                          | Glycosaminoglycans - high and low molecular weight |
| 18I    | GlcA                                                              | D-Glucuronic acid                                  |
| 12F    | Neocarradecaos-41, 3, 5, 7, 9-penta-O-sulphate (Na <sup>+</sup> ) | Glycosaminoglycans - high and low molecular weight |

|     |                                                                                                  |                                                    |
|-----|--------------------------------------------------------------------------------------------------|----------------------------------------------------|
| 12J | $\Delta$ UA-2S-GlcNAc                                                                            | Glycosaminoglycans - high and low molecular weight |
| 13A | $\Delta$ UA-2S-GalNAc-4S                                                                         | Glycosaminoglycans - high and low molecular weight |
| 13M | (GlcA/IdoA $\beta$ 1-3( $\pm$ 6S)GalNAc $\beta$ 1-4) <sub>n</sub> (n<250)                        | Glycosaminoglycans - high and low molecular weight |
| 14E | HA 30000                                                                                         | Glycosaminoglycans - high and low molecular weight |
| 13M | HA 107000                                                                                        | Glycosaminoglycans - high and low molecular weight |
| 1N  | Gal $\alpha$ 1-3Gal ( $\alpha$ 1-3 Galactobiose)                                                 | Terminal galactose                                 |
| 2B  | Gal $\beta$ 1-6Gal (beta1-6galactobiose)                                                         | Terminal galactose                                 |
| 5G  | Man $\alpha$ 1-6(Man $\alpha$ 1-3)Man( $\alpha$ 1-3, $\alpha$ 1-6-Mannobiose)                    | Mannosyl containing glycans                        |
| 10E | Neu5Ac $\alpha$ 2-3Gal $\beta$ 1-3(Neu5Ac $\alpha$ 2-6)GalNAc                                    | Sialylated glycans                                 |
| 8B  | SO <sub>3</sub> -3Gal $\beta$ 1-4(Fuca1-3)GlcNAc                                                 | Fucosylated glycans                                |
| 19M | Gal $\beta$ 1-3(Fuca1-4)GlcNAc $\beta$ 1-3Gal                                                    | Le <sup>a</sup> tetraose                           |
| 19N | Fuca1-2Gal $\beta$ 1-3(Fuca1-4)GlcNAc                                                            | Le <sup>b</sup> tetraose                           |
| 2C  | GalNAc $\beta$                                                                                   | Terminal galactose                                 |
| 20  | Rha $\alpha$                                                                                     | MONOSACCHARIDES                                    |
| 19  | ManNAc $\beta$                                                                                   | MONOSACCHARIDES                                    |
| 78  | Gal $\alpha$ 1-3GalNAc $\alpha$ -sp3                                                             | DISACCHARIDES                                      |
| 168 | GlcNAc $\beta$ 1--[HOOC(CH <sub>3</sub> )CH]-3-O-GlcNAc $\beta$ -L-alanyl-D-i-glutaminy-L-lysine | DISACCHARIDES                                      |
| 177 | Gal $\beta$ 1-4(6-O-Su)GlcNAc $\beta$                                                            | DISACCHARIDES                                      |
| 123 | Man $\beta$ 1-4GlcNAc $\beta$                                                                    | DISACCHARIDES                                      |
| 206 | Neu5Gc $\alpha$ 2-3Gal                                                                           | DISACCHARIDES                                      |
| 232 | Gal $\beta$ 1-4GlcNAc $\beta$ 1-6GalNAc $\alpha$                                                 | TRISACCHARIDES                                     |
| 240 | (Glc $\alpha$ 1-4) <sub>3</sub> $\beta$                                                          | TRISACCHARIDES                                     |
| 293 | Neu5Ac $\alpha$ 2-3Gal $\beta$ 1-4Glc $\beta$                                                    | TRISACCHARIDES                                     |
| 331 | Neu5Gc $\alpha$ 2-3Gal $\beta$ 1-3GlcNAc $\beta$                                                 | 3`Sia-Le <sup>c</sup> (Gc)                         |
| 359 | Fuca1-2(Gal $\alpha$ 1-3)Gal $\beta$ 1-3GlcNAc $\beta$                                           | B (type 1)                                         |
| 389 | GalNAc $\beta$ 1-3Gal $\alpha$ 1-4Gal $\beta$ 1-4Glc $\beta$                                     | P antigen                                          |
| 495 | Man $\alpha$ 1-3(Man $\alpha$ 1-3(Man $\alpha$ 1-6)Man $\alpha$ 1-6)Man $\beta$                  | PENTA-NONA SACCHARIDES                             |
| 534 | Neu5Ac $\alpha$ 2-3Gal $\beta$ 1-4GlcNAc $\beta$ 1-3Gal $\beta$ 1-4GlcNAc $\beta$                | PENTA-NONA SACCHARIDES                             |

### (C) Tlp4

| Glycan | Structure                                                                    | Common name                 |
|--------|------------------------------------------------------------------------------|-----------------------------|
| 240    | (Glc $\alpha$ 1-4) <sub>3</sub> $\beta$ -sp4                                 | TRISACCHARIDES              |
| 241    | (Glc $\alpha$ 1-6) <sub>3</sub> $\beta$ -sp4                                 | TRISACCHARIDES              |
| 45     | GlcA $\beta$ -sp3                                                            | MONOSACCHARIDES             |
| 19P    | Glc $\alpha$ 1-4Glc $\alpha$ 1-4Glc $\alpha$ 1-4Glc                          | Terminal Glucose structures |
| 110    | Glc $\alpha$ 1-4Glc $\beta$ -sp3                                             | DISACCHARIDES               |
| 7      | Glc $\alpha$ -sp3                                                            | MONOSACCHARIDES             |
| 112    | Glc $\beta$ 1-6Glc $\beta$ -sp4                                              | DISACCHARIDES               |
| 9      | Glc $\beta$ -sp3                                                             | MONOSACCHARIDES             |
| 287    | 3-O-Su-Gal $\beta$ 1-3(Fuca1-4)GlcNAc $\beta$ -sp3                           | Su-Le <sup>a</sup>          |
| 8J     | Fuca1-2Gal $\beta$ 1-4(Fuca1-3)GlcNAc $\beta$ 1-3(Fuca1-2)Gal $\beta$ 1-4Glc | Fucosylated glycans         |

|     |                                                                                    |                             |
|-----|------------------------------------------------------------------------------------|-----------------------------|
| 366 | Fuca1-2(GalNAca1-3)Galβ1-3GlcNAcβ-sp3                                              | A (type 1)                  |
| 368 | Fuca1-2(GalNAca1-3)Galβ1-4GlcNAcβ-sp3                                              | A (type 2)                  |
| 363 | Fuca1-2(Galα1-3)Galβ1-3GalNAcβ-sp3                                                 | B (type 4)                  |
| 359 | Fuca1-2(Galα1-3)Galβ1-3GlcNAcβ-sp3                                                 | B (type 1)                  |
| 226 | Fuca1-2(Galα1-3)Galβ-sp3                                                           | B <sub>tri</sub>            |
| 371 | Fuca1-2Galβ1-3(Fuca1-4)GlcNAcβ-sp3                                                 | Le <sup>b</sup>             |
| 217 | Fuca1-2Galβ1-3GalNAca-sp3                                                          | H (type 3)                  |
| 219 | Fuca1-2Galβ1-4Glcβ-sp4                                                             | H (type 6)                  |
| 288 | Fuca1-3(3-O-Su-Galβ1-4)GlcNAcβ-sp3                                                 | Su-Le <sup>x</sup>          |
| 372 | Fuca1-3(Fuca1-2Galβ1-4)GlcNAcβ-sp3                                                 | Le <sup>y</sup>             |
| 364 | Fuca1-3(Galα1-3Galβ1-4)GlcNAcβ-sp3                                                 | αGal-Le <sup>x</sup>        |
| 234 | Fuca1-3(Galβ1-4)GlcNAcβ-sp3                                                        | Le <sup>x</sup>             |
| 72  | Fuca1-3GlcNAcβ-sp3                                                                 | DISACCHARIDES               |
| 1   | Fuca-sp3                                                                           | MONOSACCHARIDES             |
| 7M  | Galβ1-3(Fuca1-2)Gal                                                                | Blood Group B Trisaccharide |
| 7J  | Galβ1-3(Fuca1-4)GlcNAc                                                             | Le <sup>a</sup>             |
| 7E  | Galβ1-3(Fuca1-4)GlcNAcβ1-3Galβ1-4(Fuca1-3)Glc                                      | Fucosylated glycans         |
| 233 | Galβ1-3(Fuca1-4)GlcNAcβ-sp3                                                        | Le <sup>a</sup>             |
| 8C  | Galβ1-3GlcNAcβ1-3Galβ1-4(Fuca1-3)GlcNAcβ1-3Galβ1-4Glc                              | Fucosylated glycans         |
| 7H  | Galβ1-4(Fuca1-3)Glc                                                                | Fucosylated glycans         |
| 7I  | Galβ1-4(Fuca1-3)GlcNAc                                                             | Le <sup>x</sup>             |
| 8F  | Galβ1-4(Fuca1-3)GlcNAcβ1-6(Fuca1-2Galβ1-3(Fuca1-4)GlcNAcβ1-3)Galβ1-4Glc            | Fucosylated glycans         |
| 8D  | Galβ1-4(Fuca1-3)GlcNAcβ1-6(Galβ1-3GlcNAcβ1-3)Galβ1-4Glc                            | Fucosylated glycans         |
| 19A | Galβ1-4GlcNAcβ1-2Manα1-3(Galβ1-4GlcNAcβ1-2Manα1-6Man)β1-4GlcNAcβ1-4(Fuca1-6)GlcNAc | Complex type N-glycans      |
| 8G  | Galβ1-4GlcNAcβ1-3Galβ1-4(Fuca1-3)Glc                                               | Fucosylated glycans         |
| 8E  | Galβ1-4(Fuca1-3)GlcNAcβ1-6(Fuca1-2Galβ1-3GlcNAcβ1-3)Galβ1-4Glc                     | Fucosylated glycans         |
| 75  | Galα1-2Galβ-sp3                                                                    | DISACCHARIDES               |
| 289 | Galα1-3(Neu5Aca2-6)GalNAca-sp3                                                     | TRISACCHARIDES              |
| 78  | Galα1-3GalNAca-sp3                                                                 | DISACCHARIDES               |
| 77  | Galα1-3GalNAcβ-sp3                                                                 | DISACCHARIDES               |
| 2E  | Galα1-4Galβ1-4GlcNAc                                                               | P1 antigen                  |
| 224 | Galα1-4Galβ1-4Glcβ-sp3                                                             | P <sup>k</sup> antigen      |
| 375 | Galα1-4GlcNAcβ1-3Galβ1-4GlcNAcβ-sp3                                                | TETRASACCHARIDES            |
| 81  | Galα1-4GlcNAcβ-sp3                                                                 | DISACCHARIDES               |
| 83  | Galα1-6Glcβ-sp4                                                                    | DISACCHARIDES               |
| 2   | Galα-sp3                                                                           | MONOSACCHARIDES             |
| 84  | Galβ1-2Galβ-sp3                                                                    | DISACCHARIDES               |
| 254 | Galβ1-3(GlcNAcβ1-6)GalNAca-sp3                                                     | TRISACCHARIDES              |
| 1E  | Galβ1-3GalNAc                                                                      | Terminal galactose          |
| 89  | Galβ1-3GalNAca-sp3                                                                 | DISACCHARIDES               |
| 88  | Galβ1-3GalNAcβ-sp3                                                                 | DISACCHARIDES               |
| 229 | Galβ1-3Galβ1-4GlcNAcβ-sp4                                                          | TRISACCHARIDES              |
| 87  | Galβ1-3Galβ-sp3                                                                    | DISACCHARIDES               |
| 85  | Galβ1-3GlcNAcβ-sp3                                                                 | DISACCHARIDES               |

|     |                                                                                                                                                                                                                   |                        |
|-----|-------------------------------------------------------------------------------------------------------------------------------------------------------------------------------------------------------------------|------------------------|
| 1A  | Gal $\beta$ 1-3GlcNAc                                                                                                                                                                                             | Terminal galactose     |
| 378 | Gal $\beta$ 1-3GlcNAc $\alpha$ 1-3Gal $\beta$ 1-4GlcNAc $\beta$ -sp3                                                                                                                                              | TETRASACCHARIDES       |
| 377 | Gal $\beta$ 1-3GlcNAc $\beta$ 1-3Gal $\beta$ 1-3GlcNAc $\beta$ -sp2                                                                                                                                               | TETRASACCHARIDES       |
| 2G  | Gal $\beta$ 1-3GlcNAc $\beta$ 1-3Gal $\beta$ 1-4GlcNAc $\beta$ 1-6(Gal $\beta$ 1-3GlcNAc $\beta$ 1-3)Gal $\beta$ 1-4Glc                                                                                           | Terminal galactose     |
| 1C  | Gal $\beta$ 1-4Gal                                                                                                                                                                                                | Terminal galactose     |
| 264 | Gal $\beta$ 1-4Gal $\beta$ 1-4GlcNAc-sp3                                                                                                                                                                          | TRISACCHARIDES         |
| 19B | Gal $\beta$ 1-4GlcNAc $\beta$ 1-2(Gal $\beta$ 1-4GlcNAc $\beta$ 1-4)Man $\alpha$ 1-3(Gal $\beta$ 1-4GlcNAc $\beta$ 1-2(Gal $\beta$ 1-4GlcNAc $\beta$ 1-6)Man $\alpha$ 1-6Man) $\beta$ 1-4GlcNAc $\beta$ 1-4GlcNAc | Complex type N-glycans |
| 231 | Gal $\beta$ 1-4GlcNAc $\beta$ 1-3GalNAc $\alpha$ -sp3                                                                                                                                                             | LN3-Tn                 |
| 232 | Gal $\beta$ 1-4GlcNAc $\beta$ 1-6GalNAc $\alpha$ -sp3                                                                                                                                                             | LN6-Tn                 |
| 93  | Gal $\beta$ 1-4Glc $\beta$ -sp4                                                                                                                                                                                   | Terminal galactose     |
| 2B  | Gal $\beta$ 1-6Gal                                                                                                                                                                                                | Terminal galactose     |
| 1D  | Gal $\beta$ 1-6GlcNAc                                                                                                                                                                                             | Terminal galactose     |
| 3   | Gal $\beta$ -sp3                                                                                                                                                                                                  | MONOSACCHARIDES        |
| 119 | Man $\alpha$ 1-2Man $\beta$ -sp4                                                                                                                                                                                  | DISACCHARIDES          |
| 120 | Man $\alpha$ 1-3Man $\beta$ -sp4                                                                                                                                                                                  | DISACCHARIDES          |
| 20  | Rha $\alpha$ -sp3                                                                                                                                                                                                 | MONOSACCHARIDES        |



**Table S4.** Tlp3 docking analysis.

| Kd [uM]                   | Arg  | Asp  | Fu   | Gal  | GlcN | Glu  | Iso  | Lys  | Mal  | Man  | Pur  | Sia  | Thia |
|---------------------------|------|------|------|------|------|------|------|------|------|------|------|------|------|
| Cluster A<br>(ASN 116)    | 143  | 469  | 109  | 110  | 98   | 93   | 145  | 248  | 376  | 69   | 399  | 19   | 11   |
| Cluster B<br>(ARG 69)     | -    | 851  | -    | -    | -    | -    | 548  | 574  | 472  | -    | 515  | -    | -    |
| Cluster C<br>(ASN 212)    | -    | -    | -    | -    | -    | -    | -    | -    | 663  | -    | 552  | -    | 76   |
| Cluster D<br>(PHE 216)    | -    | 731  | 326  | 196  | 161  | 143  | -    | -    | 468  | 152  | 567  | 27   | -    |
| Cluster E<br>(GLN 174)    | -    | -    | -    | -    | 250  | 232  | -    | -    | -    | 146  | 608  | 72   | 34   |
|                           |      |      |      |      |      |      |      |      |      |      |      |      |      |
| Binding energy [kcal/mol] | Arg  | Asp  | Fu   | Gal  | GlcN | Glu  | Iso  | Lys  | Mal  | Man  | Pur  | Sia  | Thia |
| Cluster A<br>(ASN 116)    | 5.25 | 4.54 | 5.41 | 5.40 | 5.47 | 5.49 | 5.24 | 4.92 | 4.67 | 5.67 | 4.64 | 6.47 | 6.75 |
| Cluster B<br>(ARG 69)     | -    | 4.19 | -    | -    | -    | -    | 4.45 | 4.42 | 4.54 | -    | 4.49 | -    | -    |
| Cluster C<br>(ASN 212)    | -    | 4.12 | -    | -    | -    | -    | -    | -    | 4.34 | -    | 4.44 | -    | 5.62 |
| Cluster D<br>(PHE 216)    | -    | 4.28 | 4.76 | 5.06 | 5.17 | 5.24 | -    | -    | 4.54 | 5.21 | 4.43 | 6.23 | -    |
| Cluster E<br>(GLN 174)    | -    | -    | -    | -    | 4.91 | 4.96 | -    | -    | -    | 5.23 | 4.39 | 5.65 | 6.10 |
|                           |      |      |      |      |      |      |      |      |      |      |      |      |      |
| #conformers               | Arg  | Asp  | Fu   | Gal  | GlcN | Glu  | Iso  | Lys  | Mal  | Man  | Pur  | Sia  | Thia |
| Cluster A<br>(ASN 116)    | 1000 | 530  | 780  | 685  | 550  | 650  | 950  | 950  | 350  | 800  | 400  | 750  | 650  |
| Cluster B<br>(ARG 69)     | -    | 55   | -    | -    | -    | -    | 50   | 50   | 250  | -    | 200  | -    | -    |
| Cluster C<br>(ASN 212)    | -    | -    | -    | -    | -    | -    | -    | -    | 50   | -    | 150  | -    | 50   |
| Cluster D<br>(PHE 216)    | -    | 315  | 120  | 315  | 400  | 300  | -    | -    | 250  | 150  | 150  | 200  | -    |
| Cluster E<br>(GLN 174)    | -    | -    | -    | -    | 50   | 50   | -    | -    | -    | 50   | 50   | 50   | 300  |

**Table S5:** Summary of chemotactic responses of  $\Delta tlp3$ ,  $\Delta tlp2$ ,  $\Delta tlp4$ ,  $\Delta tlp2,4$ ,  $\Delta tlp2,3$ ,  $\Delta tlp3,4$  and  $\Delta tlp2,3,4$  strains illustrated as log-changes compared to the wild type. Green indicates ligands identified as chemoattractants (down), red indicates ligands identified as chemorepellents (UP) and yellow indicates ligands that showed no significant difference compared with wild-type strain ( $P < 0.05$ ).

| Ligands       | $\Delta tlp3$ *  | $\Delta tlp2$   | $\Delta tlp4$   | $\Delta tlp2,4$ | $\Delta tlp2,3$ | $\Delta tlp3,4$ | $\Delta tlp2,3,4$ |
|---------------|------------------|-----------------|-----------------|-----------------|-----------------|-----------------|-------------------|
|               | Depletion assay* | Depletion assay | Depletion assay | Depletion assay | Depletion assay | Depletion assay | Depletion assay   |
| Serine        |                  | 2.0 down        | 1.5 down        | 2.7 down        | 2.2 down        | 1.5 down        | 3.1 down          |
| Methionine    |                  | 1.8 down        | 1.4 down        | 1.9 down        | 1.9 down        | 2.2 down        | 2.0 down          |
| Asparagine    |                  | 1.7 down        | 2.4 down        | 2.7 down        | 1.7 down        | 2.3 down        | 3.5 down          |
| Cysteine      |                  | 1               | 1.4 down        | 1.4 down        | 1               | 1.3 down        | 1.9 down          |
| Lysine        | 1.6 UP           | 1.4 UP          | 1.8 down        | 1.1 down        | 1.8 UP          | 1               | 1.5 UP            |
| Purine        | 1.2 down         | 1.2 down        | 1.1 down        | 1.4 down        | 1.4 down        | 1.3 down        | 2.6 down          |
| Aspartate     | 1.9 down         | 1.7 down        | 1.1 down        | 1.7 down        | 2.3 down        | 1.8 down        | 2.9 down          |
| Isoleucine    | 2.7 down         |                 |                 |                 |                 |                 |                   |
| Malic acid    | 2.0 down         |                 |                 |                 |                 |                 |                   |
| Fumaric acid  | 2.2 down         |                 |                 |                 |                 |                 |                   |
| Arginine      | 1.3 UP           |                 |                 |                 |                 |                 |                   |
| Glucosamine   | 2.1 UP           |                 |                 |                 |                 |                 |                   |
| Thiamine      | 1.2 UP           |                 |                 |                 |                 |                 |                   |
| Succinic acid | 1.2 UP           |                 |                 |                 |                 |                 |                   |
| Glucose       | 1.2 down         | 1.6 down        | 1.4 down        | 1.7 down        | 1.4 down        | 1.2 down        | 2.4 down          |
| Fucose        | 1.4 down         | 1.7 down        | 1.4 down        | 2.4 down        | 2.1 down        | 2.0 down        | 3.4 down          |
| Galactose     | 1                | 1               | 1               | 1.1 down        | 1.1 down        | 1.1 down        | 1.4 down          |
| Mannose       | 1.4 UP           | 1.2 down        | 1.0 down        | 1.4 down        | 1.2 UP          | 1.3 UP          | 1.2 UP            |
| Sialic acid   | 1.2 UP           | 1.4 down        | 1.2 down        | 1.3 down        | 1.1 UP          | 1               | 1.1 down          |

**Table S6.** Microbial strains and plasmids

| Strain/plasmid                                                                                                                                                        | Description                                                                                                                                                                                                                                                                                   | Reference/source |
|-----------------------------------------------------------------------------------------------------------------------------------------------------------------------|-----------------------------------------------------------------------------------------------------------------------------------------------------------------------------------------------------------------------------------------------------------------------------------------------|------------------|
| Bacterial strains/ plasmids                                                                                                                                           |                                                                                                                                                                                                                                                                                               |                  |
| <i>C. jejuni</i> 11168-O                                                                                                                                              | Wild type (human isolated strain) originally strain 5636/77                                                                                                                                                                                                                                   | [1])             |
| <i>C. jejuni</i> 81116 $\Delta$ <i>flaA</i> / <i>flab</i> <sup>-</sup>                                                                                                | Isogenic mutant of <i>flaA/flaB</i>                                                                                                                                                                                                                                                           | J.M. Ketley      |
| <i>C. jejuni</i> 11168-O $\Delta$ <i>tlp3</i> :: <i>aphA3</i>                                                                                                         | Isogenic mutant of <i>tlp3</i>                                                                                                                                                                                                                                                                | [2]              |
| <i>C. jejuni</i> 11168-O $\Delta$ <i>tlp2</i> :: <i>Er</i> <sup>R</sup>                                                                                               | Isogenic mutant of <i>tlp2</i>                                                                                                                                                                                                                                                                | This study       |
| <i>C. jejuni</i> 11168-O $\Delta$ <i>tlp4</i> :: <i>Cm</i> <sup>R</sup>                                                                                               | Isogenic mutant of <i>tlp4</i>                                                                                                                                                                                                                                                                | This study       |
| <i>C. jejuni</i> 11168-O $\Delta$ <i>tlp2</i> :: <i>Er</i> <sup>R</sup> $\Delta$ <i>tlp4</i> :: <i>Cm</i> <sup>R</sup>                                                | Isogenic mutant of <i>tlp2</i> and <i>tlp4</i>                                                                                                                                                                                                                                                | This study       |
| <i>C. jejuni</i> 11168-O $\Delta$ <i>tlp2</i> :: <i>Er</i> <sup>R</sup> $\Delta$ <i>tlp3</i> :: <i>Km</i> <sup>R</sup>                                                | Isogenic mutant of <i>tlp2</i> and <i>tlp3</i>                                                                                                                                                                                                                                                | This study       |
| <i>C. jejuni</i> 11168-O $\Delta$ <i>tlp3</i> :: <i>Km</i> <sup>R</sup> $\Delta$ <i>tlp4</i> :: <i>Cm</i> <sup>R</sup>                                                | Isogenic mutant of <i>tlp3</i> and <i>tlp4</i>                                                                                                                                                                                                                                                | This study       |
| <i>C. jejuni</i> 11168-O $\Delta$ <i>tlp2</i> :: <i>Er</i> <sup>R</sup> $\Delta$ <i>tlp3</i> :: <i>Km</i> <sup>R</sup> $\Delta$ <i>tlp4</i> :: <i>Cm</i> <sup>R</sup> | Isogenic mutant of <i>tlp2</i> , <i>tlp3</i> and <i>tlp4</i>                                                                                                                                                                                                                                  | This study       |
| <i>C. jejuni</i> 11168-O $\Delta$ <i>tlp2</i> :: <i>Er</i> <sup>R</sup> $\Omega$ <i>tlp2</i> :: <i>Km</i>                                                             | Complemented <i>tlp2</i> <sup>-/+</sup> mutant in <i>C. jejuni</i> 11168-O $\Delta$ <i>tlp2</i> :: <i>Er</i> <sup>R</sup>                                                                                                                                                                     | This study       |
| <i>C. jejuni</i> 11168-O $\Delta$ <i>tlp4</i> :: <i>Cm</i> <sup>R</sup> $\Omega$ <i>tlp4</i> :: <i>Km</i>                                                             | Complemented <i>tlp4</i> <sup>-/+</sup> mutant in <i>C. jejuni</i> 11168-O $\Delta$ <i>tlp4</i> :: <i>Cm</i> <sup>R</sup>                                                                                                                                                                     | This study       |
| <i>C. jejuni</i> 11168-O $\Delta$ <i>tlp3</i> :: <i>aphA3</i> $\Omega$ <i>tlp3</i> :: <i>cat</i>                                                                      | Complemented <i>tlp3</i> <sup>-/+</sup> mutant in <i>C. jejuni</i> 11168-O $\Delta$ <i>tlp3</i> :: <i>Km</i>                                                                                                                                                                                  | [2,3]            |
| <i>E. coli</i> BL21(DE3)                                                                                                                                              | F <sup>-</sup> <i>ompT hsdS<sub>B</sub></i> (r <sub>B</sub> <sup>-</sup> m <sub>B</sub> <sup>-</sup> ) <i>gal dcm</i> (DE3)                                                                                                                                                                   | Novagen          |
| <i>E. coli</i> DH5 $\alpha$                                                                                                                                           | F <sup>-</sup> , $\phi$ 80 <i>dlacZ</i> $\Delta$ M15, $\Delta$ ( <i>lacZYA-argF</i> )U169, <i>deoR</i> , <i>recA1</i> , <i>endA1</i> , <i>hsdR17</i> (rK <sup>-</sup> , mK <sup>+</sup> ), <i>phoA</i> , <i>supE44</i> , $\lambda$ <sup>-</sup> , <i>thi-1</i> , <i>gyrA96</i> , <i>relA1</i> | [3]              |
| pGEM-T Easy                                                                                                                                                           | Cloning vector                                                                                                                                                                                                                                                                                | Promega          |
| pET-19b                                                                                                                                                               | His-tag expression vector                                                                                                                                                                                                                                                                     | Novagen          |
| pGU0504                                                                                                                                                               | <i>tlp2</i> <sup>peri</sup> cloned into pGEM-T Easy                                                                                                                                                                                                                                           | This study       |
| pGU0706                                                                                                                                                               | <i>tlp4</i> <sup>peri</sup> cloned into pGEM-T Easy                                                                                                                                                                                                                                           | This study       |
| pGU0505                                                                                                                                                               | <i>tlp2</i> <sup>peri</sup> cloned into pET-19b                                                                                                                                                                                                                                               | This study       |
| pGU0707                                                                                                                                                               | <i>tlp4</i> <sup>peri</sup> cloned into pET-19b                                                                                                                                                                                                                                               | This study       |
| pGU0816                                                                                                                                                               | <i>tlp3</i> <sup>peri</sup> cloned into pET-19b                                                                                                                                                                                                                                               | [2]              |
| pGU0817                                                                                                                                                               | Tlp3 <sup>LB</sup> DK149A                                                                                                                                                                                                                                                                     | This study       |
| pGU0818                                                                                                                                                               | Tlp3 <sup>LB</sup> DW151A                                                                                                                                                                                                                                                                     | This study       |
| pGU0819                                                                                                                                                               | Tlp3 <sup>LB</sup> DD169A                                                                                                                                                                                                                                                                     | This study       |
| pGU0820                                                                                                                                                               | Tlp3 <sup>LB</sup> DT170A                                                                                                                                                                                                                                                                     | This study       |
| pGU0821                                                                                                                                                               | Tlp3 <sup>LB</sup> DD196A                                                                                                                                                                                                                                                                     | This study       |
| pGU0510                                                                                                                                                               | $\Delta$ <i>tlp2</i> :: <i>Er</i> <sup>R</sup> cloned into pGEM-T Easy                                                                                                                                                                                                                        | This study       |

|             |                                                               |            |
|-------------|---------------------------------------------------------------|------------|
| pGU0720     | $\Delta tlp4::Cm^R$ cloned into pGEM-T Easy                   | This study |
| pGU0817     | $\Delta tlp3::Km^R$ cloned into pGEM-T Easy                   | [2]        |
| pK46 $tlp2$ | pK46: $tlp2^{peri}$                                           | This study |
| pK46 $tlp4$ | pK46: $tlp4^{peri}$                                           | This study |
| pK46        | <i>C. jejuni</i> cj0046 pseudogene integration vector; $Km^R$ | [2,4]      |

**Table S7.** Primers used in this study.

| Primer name                 | Sequence 5'-3'                           | Restriction Site | Reference  |
|-----------------------------|------------------------------------------|------------------|------------|
| Tlp2 <sup>LBD</sup> Forward | <u>CATATGCAAGCAATTTTTTCATGAAGTTGTGA</u>  | NdeI             | This study |
| Tlp2 <sup>LBD</sup> Reverse | <u>CTCGAGTTATAAACTGGAGCTTCTATTTGTT</u>   | XhoI             | This study |
| Tlp2 Forward                | <u>CATATGAAAAGCGTAAAATTG</u>             | NdeI             | This study |
| Tlp2 Reverse                | <u>CTCGAGTTAAAACCTCTTCTTCTTAACATC</u>    | XhoI             | This study |
| Tlp2_invMUT Forward         | <u>AGATCTCTGCAGCAGCTTTAGAAGAG</u>        | BglIII           | This study |
| Tlp2_invMUT Reverse         | <u>AGATCTGCCGCAAGAATATCTACAGC</u>        | BglIII           | This study |
| Tlp4 <sup>LBD</sup> Forward | <u>CTCGAGGATTCGAGAAACAATACATATGAATT</u>  | XhoI             | This study |
| Tlp4 <sup>LBD</sup> Reverse | <u>CTCGAGTTGTTTCATTAAAATAGAATTAACAGC</u> | XhoI             | This study |
| Tlp4 Forward                | <u>GGTACCCAATCAATAAATTCAGG</u>           | KpnI             | This study |
| Tlp4 Reverse                | <u>CTCGAGTTAAAACCTCTTCTTCTTAACATC</u>    | XhoI             | This study |
| Tlp4_invMUT Forward         | <u>AGATCTCACCAAGGCGTAGATTATGC</u>        | BglIII           | This study |
| Tlp4_invMUT Reverse         | <u>AGATCTTTCCAACCCATAGCGTAAGC</u>        | BglIII           | This study |
| Tlp2Com Forward             | <u>ACTCGTCTCATGAAAAGCGTAAAATTG</u>       | BsmBI            | This study |
| Tlp2Com Reverse             | <u>GTCCGCTCTTAAAACCTCTTCTTCTTAAC</u>     | BsmBI            | This study |
| Tlp3 Forward                | <u>ATGCTAAAATAACAAAGATTAATAAG</u>        | -                | This study |
| Tlp3 Reverse                | <u>AAACCTCTTCTTCTTAACATC</u>             | -                | This study |
| Tlp4Com Forward             | <u>ACTCGTCTCATGCAATCAATAAATTCAGG</u>     | BsmBI            | This study |
| Tlp4Com Reverse             | <u>GTCCGCTCTTAAAACCTCTTCTTCTTAACATC</u>  | BsmBI            | This study |
| cj0046 Forward              | <u>CTCTCTCCGCTAGAAATTAATCC</u>           | -                | This study |
| Ery_ Forward (ErmCBgIII-F)  | <u>AGATCTATGAACGAGAAAAATATAAAACACAG</u>  | BglIII           | This study |
| Ery Reverse (ErmCBgIII-R)   | <u>AGATCTTTACTTATTAATAATTTATAGCTA</u>    | BglIII           | This study |
| Chlr_ Forward               | <u>AGATCTATGATGCAATTCACAAAGATT</u>       | BglIII           | This study |
| Chlr_ Reverse               | <u>AGATCTTTATTTATTCAGCAAGTCTTG</u>       | BglIII           | This study |
| Kan_ Forward                | <u>AATGGCTAAAATGAGAATATC</u>             | -                | This study |
| Kan_ Reverse                | <u>AAACAATTCATCCAGTAAAAT</u>             | -                | This study |
| pC46 Cat Forward            | <u>ATGATGCAATTCACAAAGATT</u>             | -                | [2]        |
| pC46 Cat Reverse            | <u>TTATTTATTCAGCAAGTCTTG</u>             | -                | [2]        |
| pK46 Kan Forward            | <u>AATGGCTAAAATGAGAATATC</u>             | -                | [2]        |
| pK46 Kan Reverse            | <u>AAACAATTCATCCAGTAAAAT</u>             | -                | [2]        |

**Table S8** - Supplementary glycan microarray document based on MIRAGE guidelines. DOI:

10.1093/glycob/cww118.

| Classification                           | Guidelines                                                                                                                                                                                                                                                                                                                                                                                                                                                                                                                                                                                                                                                                                                                                                                                                                                                                                                                                                                     |
|------------------------------------------|--------------------------------------------------------------------------------------------------------------------------------------------------------------------------------------------------------------------------------------------------------------------------------------------------------------------------------------------------------------------------------------------------------------------------------------------------------------------------------------------------------------------------------------------------------------------------------------------------------------------------------------------------------------------------------------------------------------------------------------------------------------------------------------------------------------------------------------------------------------------------------------------------------------------------------------------------------------------------------|
| <b>1. Sample: Glycan Binding Sample</b>  |                                                                                                                                                                                                                                                                                                                                                                                                                                                                                                                                                                                                                                                                                                                                                                                                                                                                                                                                                                                |
| Description of Sample                    | <p><u>Sample names:</u><br/>Tlp2,3,and 4 proteins</p> <p><u>Origin:</u> <i>Helicobacter pylori</i> SS1; produced as a recombinant His -tagged protein in <i>E. coli</i>.</p> <p><u>Method of preparation:</u><br/>The preparation of Tlp2,3, and 4 is explained in the Materials and Methods section: Expression and purification of the periplasmic domain of Tlp2,3, and 4.</p>                                                                                                                                                                                                                                                                                                                                                                                                                                                                                                                                                                                              |
| Sample modifications                     | Sample is a His Tagged protein containing only the periplasmic receptor domain of the full length Tlp2,3, and 4 transmembrane protein.                                                                                                                                                                                                                                                                                                                                                                                                                                                                                                                                                                                                                                                                                                                                                                                                                                         |
| Assay protocol                           | <p><i>Please see Materials and Methods: Tlps 2/3/4 bind to a range of ligands, including glycans and amino acids</i></p> <p>Proteins were complexed with mouse anti-his antibody, with secondary and tertiary AlexaFluor555 antibodies (rabbit anti-mouse, goat anti-rabbit) at a molar ratio of 4:2:1. The protein/antibody complex was incubated on ice for 10 mins prior to placing on the array. Arrays were performed with 1 µg of complexed protein incubated on the array for 20 min. Arrays were then washed 3 times in Array PBS (PBS + 2mM MgCl<sub>2</sub> + 2mM CaCl<sub>2</sub>) then dried by centrifugation for 3 min at 300 x g. Scanning was performed using an Innopsys InnoScan 1100AL and analyzed using Mapix (Innopsys). Yes/no binding was determined by six positive replicate spots in three replicate experiments. Positive binding was determined by spots being significantly greater than negative control spots by two-tailed <i>t</i> test.</p> |
| <b>2.1 Glycan Library</b>                |                                                                                                                                                                                                                                                                                                                                                                                                                                                                                                                                                                                                                                                                                                                                                                                                                                                                                                                                                                                |
| Glycan description for defined glycans   | Glycans in this study are listed in Table S2 and is a published library in doi: 10.1371/journal.pntd.0004120.                                                                                                                                                                                                                                                                                                                                                                                                                                                                                                                                                                                                                                                                                                                                                                                                                                                                  |
| Glycan description for undefined glycans | N/A.                                                                                                                                                                                                                                                                                                                                                                                                                                                                                                                                                                                                                                                                                                                                                                                                                                                                                                                                                                           |
| Glycan modifications                     | <p>Glycans were prepared in one of two ways for printing:</p> <p>1. Glycans (with IDs in number/letter format; e.g. 1A, 4C, 7K) were sourced commercially from Dextra Laboratories, Elicityl and Carbosynth and were made into glycoamines using the protocol published in Day et al 2009 (doi: 10.1371/journal.pone.0004927).</p>                                                                                                                                                                                                                                                                                                                                                                                                                                                                                                                                                                                                                                             |

|                                                    |                                                                                                                                                                                                                                                                                                                                                                                                                                                                                                                                                         |
|----------------------------------------------------|---------------------------------------------------------------------------------------------------------------------------------------------------------------------------------------------------------------------------------------------------------------------------------------------------------------------------------------------------------------------------------------------------------------------------------------------------------------------------------------------------------------------------------------------------------|
|                                                    | 2. Glycans (with IDs in number only format) were obtained from Prof Nicolai Bovin and were modified with spacers as per DOI: 10.1073/pnas.0407902101. The library of these glycans was first published in DOI: 10.1016/j.molimm.2009.06.010                                                                                                                                                                                                                                                                                                             |
| <b>2.2 Small molecule Library</b>                  |                                                                                                                                                                                                                                                                                                                                                                                                                                                                                                                                                         |
| Sample description for defined compounds           | Compounds printed in the amino acid/small molecule array for this study are listed in Table 1 and Table S5.                                                                                                                                                                                                                                                                                                                                                                                                                                             |
| <b>3. Printing Surface; e.g., Microarray Slide</b> |                                                                                                                                                                                                                                                                                                                                                                                                                                                                                                                                                         |
| Description of surface                             | Epoxy activated glass microarray slides.                                                                                                                                                                                                                                                                                                                                                                                                                                                                                                                |
| Manufacturer                                       | ArrayIt SuperEpoxy 3 (SME3).                                                                                                                                                                                                                                                                                                                                                                                                                                                                                                                            |
| Custom preparation of surface                      | N/A.                                                                                                                                                                                                                                                                                                                                                                                                                                                                                                                                                    |
| Non-covalent Immobilisation                        | N/A.                                                                                                                                                                                                                                                                                                                                                                                                                                                                                                                                                    |
| <b>4. Arrayer (Printer)</b>                        |                                                                                                                                                                                                                                                                                                                                                                                                                                                                                                                                                         |
| Description of Arrayer                             | <b>Glycan array:</b> SpotBot® Extreme Protein Microarray Spotter (ArrayIt, California, USA).<br><b>Small molecule array:</b> ArrayJet Argus Marathon non-contact printer.                                                                                                                                                                                                                                                                                                                                                                               |
| Dispensing mechanism                               | <b>Glycan array:</b> Contact printing using 946NS6 pins with a 6 pin in a 3 columns x 2 rows configuration.<br><b>Small molecule array:</b> Non-contact jet printing                                                                                                                                                                                                                                                                                                                                                                                    |
| Glycan and small molecule deposition               | <b>Glycan array:</b> Approximately 1.8 nl per spot is printed according to manufactures guidelines.<br>Glycan were at 500 µM in 50:50 DMF:DMSO.<br><b>Small molecule array:</b> Approximately 320 nl per spot is printed according to manufactures guidelines.<br>Samples were at 1000 µM in PBS with 2% glycerol                                                                                                                                                                                                                                       |
| Printing conditions                                | <b>Glycan array:</b> Array were printed with dehumidification at a maximum humidity of 60% relative humidity (Standard laboratory starting humidity of 75-90%) at 22°C. Glycans were left to react with the slide for at least 8 hours after the print was completed.<br><b>Small molecule array:</b> Array were printed with dehumidification at a maximum humidity of 60% relative humidity (Standard laboratory starting humidity of 75-90%) at 22°C. Samples were left to react with the slide for at least 15 hours after the print was completed. |
| <b>5.1 Glycan array with “Map”</b>                 |                                                                                                                                                                                                                                                                                                                                                                                                                                                                                                                                                         |

|                                                              |                                                                                                                                                                                                                                                                                                                                                                                                                                                                                                                                                                                                                                                                                                                                                                                                                       |
|--------------------------------------------------------------|-----------------------------------------------------------------------------------------------------------------------------------------------------------------------------------------------------------------------------------------------------------------------------------------------------------------------------------------------------------------------------------------------------------------------------------------------------------------------------------------------------------------------------------------------------------------------------------------------------------------------------------------------------------------------------------------------------------------------------------------------------------------------------------------------------------------------|
| Array layout                                                 | The array consists of a single array of glycans split between 6 pins (3 columns x 2 rows) with 4500µm row and column spacing. Each pin printed a 20 columns x 16 rows with 200µm spot spacing (centre to centre) with a minimum spot size of 100µm. Each sample is printed in quadruplicate with each of the 6 print areas including at least three negative control samples (print solution only) and two positive control samples consisting of one sample of fluoroscienamine and one sample of a mixture of rabbit anti-mouse antibody labeled with Alexa 555 and Alexa 647. Positive controls provide proof of successful immobilization of the amine reagents and provides for orientation for analysis. The antibodies also can provide controls for secondary antibodies used in experiments (if applicable). |
| Glycan identification and quality control                    | Arrays are quality controlled by a range of measures. 1. Each printed array is post print scanned to confirm deposition of the glycans on the array surface prior to neutralization of the remaining slide surface. 2. Post neutralized slides are scanned again to monitor for remaining autofluorescence. 3. Slides are assayed with fluorescently labeled lectins: WGA-Texas Red (EY Laboratories) and ConA-FITC (EY Laboratories).                                                                                                                                                                                                                                                                                                                                                                                |
| <b>5.2 Small molecule array with “Map”</b>                   |                                                                                                                                                                                                                                                                                                                                                                                                                                                                                                                                                                                                                                                                                                                                                                                                                       |
| Array layout                                                 | The array consists of triplicate sub-arrays of amino acids and small molecules (24 rows x 10 columns) with 400µm spot spacing (centre to centre) with a minimum spot size of 100µm. Each sample is printed six times, with each of the 3 sub-arrays including at least six negative control samples (print solution only) and a positive control samples consisting of one a mixture of rabbit anti-mouse antibody labeled with Alexa 555 and Alexa 647. Positive controls provide proof of successful immobilization of the amine reagents and provides for orientation for analysis.                                                                                                                                                                                                                                |
| Sample identification and quality control                    | Arrays are quality controlled by a range of measures. 1. Each printed array is post print scanned to confirm deposition of the samples on the array surface prior to neutralization of the remaining slide surface. 2. Post neutralized slides are scanned again to monitor for remaining autofluorescence.                                                                                                                                                                                                                                                                                                                                                                                                                                                                                                           |
| <b>6. Detector and Data Processing</b>                       |                                                                                                                                                                                                                                                                                                                                                                                                                                                                                                                                                                                                                                                                                                                                                                                                                       |
| Scanning hardware                                            | Inopsys InnoScan 1100AL (Lasers: 488 nM, 532 nM with two filter sets for analysis at 532 and 595 nM), 635 nM) scanner.                                                                                                                                                                                                                                                                                                                                                                                                                                                                                                                                                                                                                                                                                                |
| Scanner settings                                             | Scanning resolution: 10µM<br>Laser channel: 532nM operating 595nM excitation / 625nM emission filter set.<br>PMT: 20% gain<br>Scan powers: Low laser power.                                                                                                                                                                                                                                                                                                                                                                                                                                                                                                                                                                                                                                                           |
| Image analysis software                                      | Innopsys MAPIX.                                                                                                                                                                                                                                                                                                                                                                                                                                                                                                                                                                                                                                                                                                                                                                                                       |
| Data processing                                              | Data was exported as a CSV file and exported to Microsoft Excel.                                                                                                                                                                                                                                                                                                                                                                                                                                                                                                                                                                                                                                                                                                                                                      |
| <b>7. Glycan Microarray Data Presentation</b>                |                                                                                                                                                                                                                                                                                                                                                                                                                                                                                                                                                                                                                                                                                                                                                                                                                       |
| Data presentation                                            | Glycan array: Data is presented as yes/no binding in Table 1. The full list of glycans is shown in Table S5.                                                                                                                                                                                                                                                                                                                                                                                                                                                                                                                                                                                                                                                                                                          |
| <b>8. Interpretation and Conclusion from Microarray Data</b> |                                                                                                                                                                                                                                                                                                                                                                                                                                                                                                                                                                                                                                                                                                                                                                                                                       |

|                     |                                                                                                                                                                                                                                                                                                                                                                                                                                                                                                                                                                                                                                                                                                                                                                                                                                                                                                                                                                                                                                                                                                             |
|---------------------|-------------------------------------------------------------------------------------------------------------------------------------------------------------------------------------------------------------------------------------------------------------------------------------------------------------------------------------------------------------------------------------------------------------------------------------------------------------------------------------------------------------------------------------------------------------------------------------------------------------------------------------------------------------------------------------------------------------------------------------------------------------------------------------------------------------------------------------------------------------------------------------------------------------------------------------------------------------------------------------------------------------------------------------------------------------------------------------------------------------|
| Data interpretation | <p><b>Glycan arrays:</b> We only use glycan arrays as a yes/no binding tool. Due to this we look only at binding that is unambiguously above background vs lack of binding above background. Average background + 3x standard deviation of the background of 20 sets of 4 spots of DMF:DMSO only spots is applied to determine if binding observed is significantly above background. Only spots with values equal to or greater than this value were considered as binding from data of any tested slide. These values are slide dependent.</p> <p><b>Small molecule arrays:</b> We only use amino acid arrays as a yes/no binding tool. Due to this we look only at binding that is unambiguously above background vs lack of binding above background. Average background + 3x standard deviation of the background of 6 spots of PBS + 2% glycerol only spots is applied to determine if binding observed is significantly above background. Only spots with values equal to or greater than this value were considered as binding from data of any tested slide. These values are slide dependent.</p> |
| Conclusions         | Tlp2, Tlp3 and Tlp4 are a paralogue family of dCache_1 chemoreceptors which capable of responding to carbohydrates including complex glycans as well as to organic and amino acids                                                                                                                                                                                                                                                                                                                                                                                                                                                                                                                                                                                                                                                                                                                                                                                                                                                                                                                          |

## References

1. Skirrow M (1977) *Campylobacter* enteritis: a "new" disease. *Br Med J* 2: 9-11.
2. Rahman H, King RM, Shewell LK, Semchenko EA, Hartley-Tassell LE, et al. (2014) Characterisation of a multi-ligand binding chemoreceptor CcmL (Tlp3) of *Campylobacter jejuni*. *PLoS Pathog* 10: e1003822.
3. Hanahan D (1983) Studies on transformation of *Escherichia coli* with plasmids. *Journal of molecular biology* 166: 557-580.
4. Gaskin D, Van Vliet A, Pearson B. The *Campylobacter* genetic toolbox: development of tractable and generally applicable genetic techniques for *Campylobacter jejuni*; 2007. BLACKWELL PUBLISHING. pp. 101-101.
